# Supplementary material for: Genomic Diversity of Pigeon Pea (Cajanus cajan L. Millsp.) Endosymbionts in India and Selection of Potential Strains for Use as Agricultural Inoculants
Source: Frontiers journal article supplement (doi:10.3389/fpls.2021.680981), 2021-09-07
Supplement: Image_2.pdf [file Image_2.pdf]

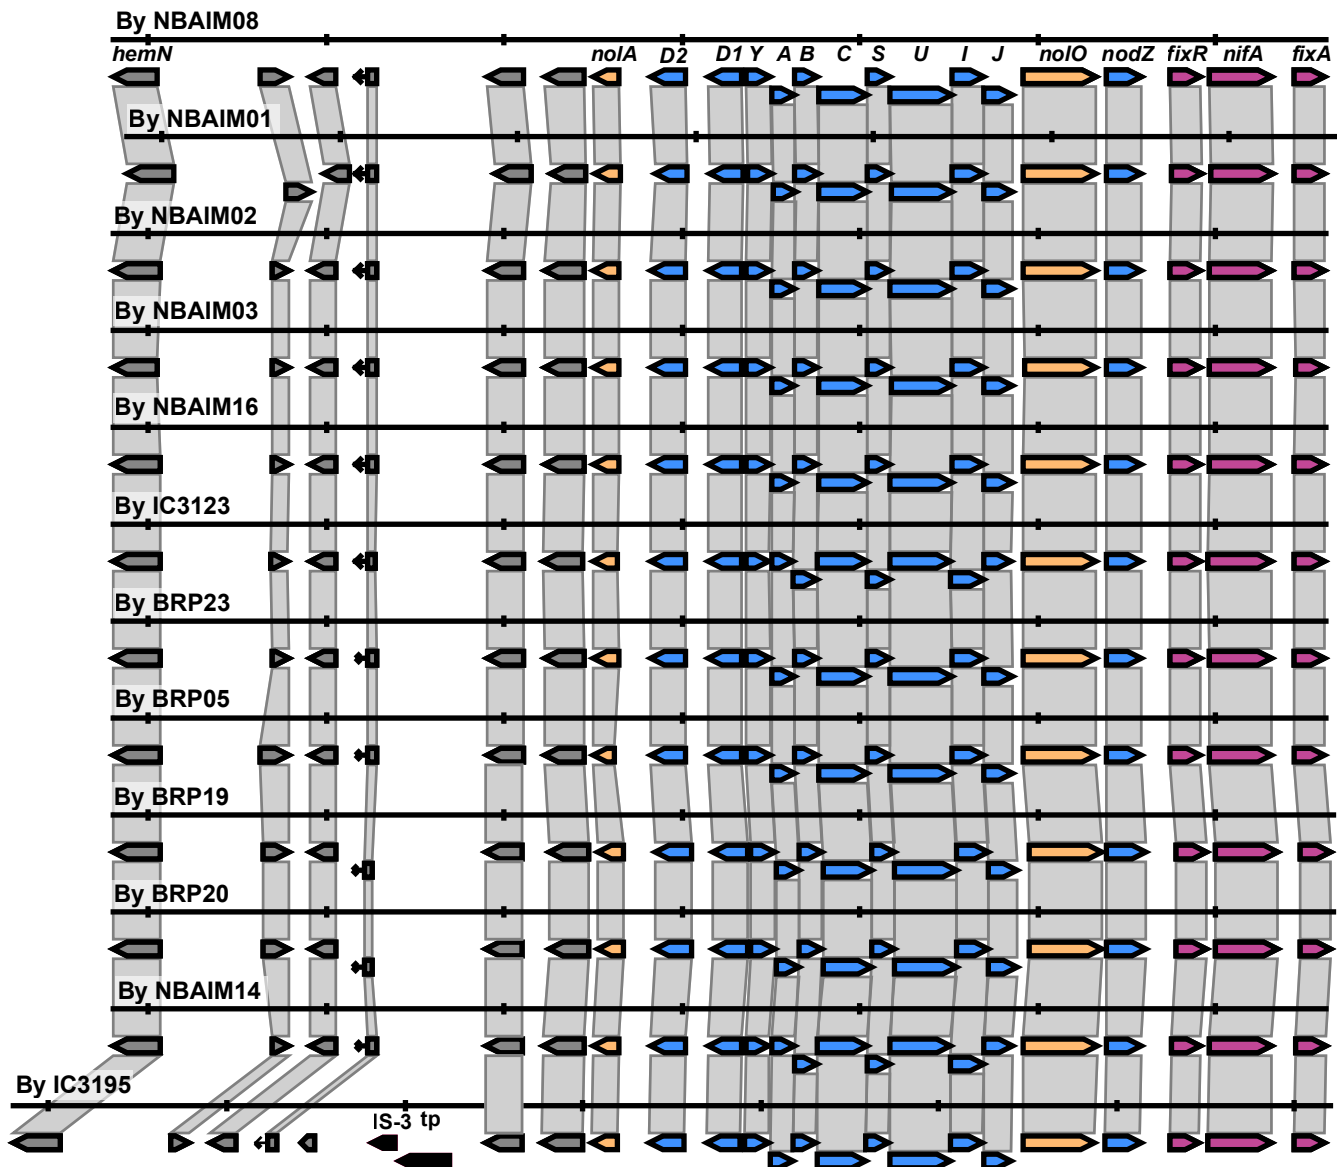

**Supplementary Figure S2. The *nod* cluster synteny of IU and IC strains in the Bc group.**

Each row represents a single strain and shows the *nod* cluster organisation and its genomic context. The colour of the arrow reflects the genes: blue for *nod*, yellow for *nol*, pink for *fix-nif* and black for transposases/insertion-related genes. Vertical markers indicate 5Kb in each genome.
