# Supplementary material for: Genomic Diversity of Pigeon Pea (Cajanus cajan L. Millsp.) Endosymbionts in India and Selection of Potential Strains for Use as Agricultural Inoculants
Source: Frontiers journal article supplement (doi:10.3389/fpls.2021.680981), 2021-09-07
Supplement: Image_4.pdf [file Image_4.pdf]

**A**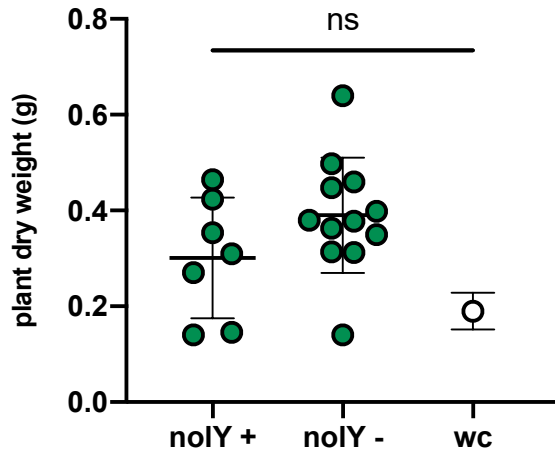**B**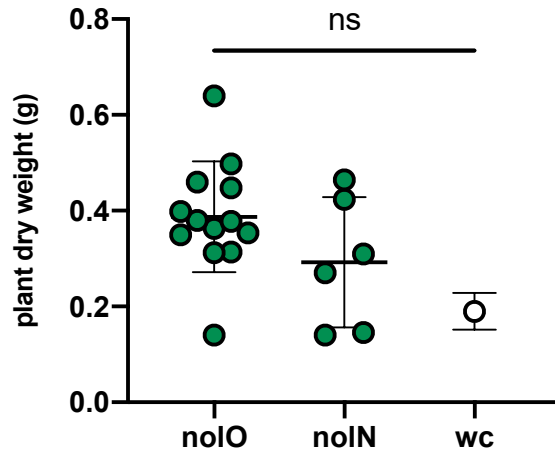

**Supplementary Figure S4. A comparison of the *nod* cluster synteny within the *Bradyrhizobium* spp. and effect on plant growth.** A) plant dry weight plotted against presence and absence of *noIY*. B) plant dry weight plotted against presence of *noIO* or *noIN*. Each dot represents the average of 5 biological replicates. Error bars represent standard error of the mean. Significant differences were assessed across samples and indicated by horizontal lines. ns: no significant. Analysis was performed using ANOVA with Sidak's post-hoc test. *wc*: water control.
