# Supplementary material for: Genomic Diversity of Pigeon Pea (Cajanus cajan L. Millsp.) Endosymbionts in India and Selection of Potential Strains for Use as Agricultural Inoculants
Source: Front Plant Sci. 2021 Sep 7;12:680981. doi: 10.3389/fpls.2021.680981 (PMC8453007; doi:10.3389/fpls.2021.680981)
Supplement: Supplementary file 5 [file Table_1.xlsx]

## Sheet: Supplementary Table S1
Supplementary Table S1. List of all strains isolated and used in this study.
Strain	Other Name	Host	Isolated	Latitude (º)	Longitude (º)	Source
HU01	86B	Cajanus cajan cv M.K.K. (ICPH2740)	Kopparapadu, Prakasam, Andhra Pradesh, India.	15.9383	79.9601	University of Hyderabad. Gachibowli, Telangana. India
HU04	31F	Cajanus cajan cv M.K.K. (ICPH2740)	Toopram, Medak, Telangana, India.	17.8439	78.4848	University of Hyderabad. Gachibowli, Telangana. India
HU11	151D	Cajanus cajan cv M.K.K. (ICPH2740)	Koyyagarupadu, Krishna, Andhra Pradesh, India.	16.5084	80.9141	University of Hyderabad. Gachibowli, Telangana. India
HU12	40-II-D	Cajanus cajan cv M.K.K. (ICPH2740)	Kothur, Sangareddy, Telangana, India.	17.1489	78.2925	University of Hyderabad. Gachibowli, Telangana. India
HU13	129-II-J	Cajanus cajan cv M.K.K. (ICPH2740)	Lakshmipuram, Guntur, Andhra Pradesh, India.	16.3074	80.4347	University of Hyderabad. Gachibowli, Telangana. India
HU14	83C	Cajanus cajan cv M.K.K. (ICPH2740)	Chakranapalem, Prakasam, Andhra Pradesh, India.	15.864	79.95	University of Hyderabad. Gachibowli, Telangana. India
HU15	44C	Cajanus cajan cv M.K.K. (ICPH2740)	Huggeli, Sangareddy, Telangana, India.	17.6196	78.0721	University of Hyderabad. Gachibowli, Telangana. India
HU16	160F	Cajanus cajan cv M.K.K. (ICPH2740)	Kuppergontla, Krishna, Andhra Pradesh, India.	17.1633	80.6353	University of Hyderabad. Gachibowli, Telangana. India
HU17	103H/A8	Cajanus cajan cv M.K.K. (ICPH2740)	Kotanemalipuri, Guntur, Andhra Pradesh, India.	16.3394	80.4609	University of Hyderabad. Gachibowli, Telangana. India
HU18	108B	Cajanus cajan cv M.K.K. (ICPH2740)	Thimmaraddigaripally, Chittoor, Andhra Pradesh, India.	17.9349	78.8541	University of Hyderabad. Gachibowli, Telangana. India
HU20	68A	Cajanus cajan cv M.K.K. (ICPH2740)	Ponigodu, Nalgonda, Telangana, India.	16.9217	79.7364	University of Hyderabad. Gachibowli, Telangana. India
HU21	PP1	Cajanus cajan cv M.K.K. (ICPH2740)	Shankarpally, Rangareddy, Telangana, India.	17.45	78.1306	University of Hyderabad. Gachibowli, Telangana. India
HU22	8D	Cajanus cajan cv M.K.K. (ICPH2740)	Madireddipally, Rangareddy, Telangana, India.	17.452	78.0046	University of Hyderabad. Gachibowli, Telangana. India
HU23	35B	Cajanus cajan cv M.K.K. (ICPH2740)	Madikunta, Sangareddy, Telangana, India.	17.6038	77.9158	University of Hyderabad. Gachibowli, Telangana. India
HU24	66K	Cajanus cajan cv M.K.K. (ICPH2740)	Uduthapally, Nalgonda, Telangana, India.	17.058	79.3021	University of Hyderabad. Gachibowli, Telangana. India
HU25	10D	Cajanus cajan cv M.K.K. (ICPH2740)	Kerilley, Rangareddy, Telangana, India.	17.4576	78.3341	University of Hyderabad. Gachibowli, Telangana. India
HU29	86F	Cajanus cajan cv M.K.K. (ICPH2740)	Kopparapadu, Prakasam, Andhra Pradesh, India.	15.9383	79.9601	University of Hyderabad. Gachibowli, Telangana. India
HU34	53-II-A	Cajanus cajan cv M.K.K. (ICPH2740)	Vittunayakthanda, Sangareddy, Telangana, India.	17.6186	78.0748	University of Hyderabad. Gachibowli, Telangana. India
HU35	129-II-G	Cajanus cajan cv M.K.K. (ICPH2740)	Lakshmipuram, Guntur, Andhra Pradesh, India.	16.3074	80.4347	University of Hyderabad. Gachibowli, Telangana. India
HU36	7G	Cajanus cajan cv M.K.K. (ICPH2740)	Ekmamidi, Rangareddy, Telangana, India.	17.4123	77.9114	University of Hyderabad. Gachibowli, Telangana. India
HU37	138A	Cajanus cajan cv M.K.K. (ICPH2740)	K. J. Mahal, Khammam, Telangana, India.	17.2386	80.1185	University of Hyderabad. Gachibowli, Telangana. India
HU39	26A	Cajanus cajan cv M.K.K. (ICPH2740)	Rangampet, Medak, Telangana, India.	17.9445	78.1133	University of Hyderabad. Gachibowli, Telangana. India
HU40	40B	Cajanus cajan cv M.K.K. (ICPH2740)	Kothur, Sangareddy, Telangana, India.	17.1489	78.2925	University of Hyderabad. Gachibowli, Telangana. India
HU44	25B	Cajanus cajan cv M.K.K. (ICPH2740)	Yenagandla, Medak, Telangana, India.	17.9208	78.0894	University of Hyderabad. Gachibowli, Telangana. India
HU49	IC-6B	Cajanus cajan cv M.K.K. (ICPH2740)	Shankarpally, Rangareddy, Telangana, India.	17.45	78.1306	University of Hyderabad. Gachibowli, Telangana. India
HU50	104C	Cajanus cajan cv M.K.K. (ICPH2740)	Chotapapayipalem, Guntur, Andhra Pradesh, India.	16.4763	79.9943	University of Hyderabad. Gachibowli, Telangana. India
HU53	83B	Cajanus cajan cv M.K.K. (ICPH2740)	Chakranapalem, Prakasam, Andhra Pradesh, India.	15.864	79.95	University of Hyderabad. Gachibowli, Telangana. India
HU54	86D	Cajanus cajan cv M.K.K. (ICPH2740)	Kopparapadu, Prakasam, Andhra Pradesh, India.	15.9383	79.9601	University of Hyderabad. Gachibowli, Telangana. India
HU55	23C	Cajanus cajan cv M.K.K. (ICPH2740)	Ghanapur, Medak, Telangana, India.	18.044	78.7508	University of Hyderabad. Gachibowli, Telangana. India
HU56	94C	Cajanus cajan cv M.K.K. (ICPH2740)	Rompicharla, Guntur, Andhra Pradesh, India.	16.2112	79.9125	University of Hyderabad. Gachibowli, Telangana. India
HU57	1C/A16	Cajanus cajan cv M.K.K. (ICPH2740)	Mokhila, Rangareddy, Telangana, India.	17.4282	78.1832	University of Hyderabad. Gachibowli, Telangana. India
HU59	151A	Cajanus cajan cv M.K.K. (ICPH2740)	Koyyagarupadu, Krishna, Telangana, India.	17.4576	78.3341	University of Hyderabad. Gachibowli, Telangana. India
BRP01	P2F2	Cajanus cajan cv Asha (ICPL87119)	IISS (Indian Institute of Soil Science), Bhopal, India.	23.2599	77.4126	ICAR-Indian Institute of Soil Science, Bhopal, Madhya Pradesh, India
BRP02	BISN2	Cajanus cajan cv Asha (ICPL87119)	IISS (Indian Institute of Soil Science), Bhopal, India.	23.3069	77.4091	ICAR-Indian Institute of Soil Science, Bhopal, Madhya Pradesh, India
BRP03	HSN2	Cajanus cajan cv Asha (ICPL87119)	Sukhisevaniya,Vidisha road, India.	23.3438	77.4799	ICAR-Indian Institute of Soil Science, Bhopal, Madhya Pradesh, India
BRP04	KHEDI LARGE	Cajanus cajan cv Asha (ICPL87119)	Khedi, Berasia, Bhopal, India.	23.4564	77.3567	ICAR-Indian Institute of Soil Science, Bhopal, Madhya Pradesh, India
BRP05	P2	Cajanus cajan cv Asha (ICPL87119)	IISS (Indian Institute of Soil Science), Bhopal, India.	23.2599	77.4126	ICAR-Indian Institute of Soil Science, Bhopal, Madhya Pradesh, India
BRP06	PK LARGE	Cajanus cajan cv Asha (ICPL87119)	Phandakalan, Sehore road, Bhopal, India.	23.2395	77.2369	ICAR-Indian Institute of Soil Science, Bhopal, Madhya Pradesh, India
BRP07	P3-3	Cajanus cajan cv Asha (ICPL87119)	IISS (Indian Institute of Soil Science), Bhopal, India.	23.3069	77.4091	ICAR-Indian Institute of Soil Science, Bhopal, Madhya Pradesh, India
BRP08	P2F2-3	Cajanus cajan cv Asha (ICPL87119)	IISS (Indian Institute of Soil Science), Bhopal, India.	23.3069	77.4091	ICAR-Indian Institute of Soil Science, Bhopal, Madhya Pradesh, India
BRP09	BAL LARGE-3	Cajanus cajan cv Asha (ICPL87119)	Balampur, Vidisha, India.	23.3894	77.5389	ICAR-Indian Institute of Soil Science, Bhopal, Madhya Pradesh, India
BRP10	KHEDI -3	Cajanus cajan cv Asha (ICPL87119)	Khedi, Berasia, Bhopal, India.	23.4564	77.3567	ICAR-Indian Institute of Soil Science, Bhopal, Madhya Pradesh, India
BRP11	KHEDI -3(2)	Cajanus cajan cv Asha (ICPL87119)	Khedi, Berasia, Bhopal, India.	23.4564	77.3567	ICAR-Indian Institute of Soil Science, Bhopal, Madhya Pradesh, India
BRP13	P3-3(1)	Cajanus cajan cv Asha (ICPL87119)	IISS (Indian Institute of Soil Science), Bhopal, India.	23.2599	77.4126	ICAR-Indian Institute of Soil Science, Bhopal, Madhya Pradesh, India
BRP14	PK SMALL -2	Cajanus cajan cv Asha (ICPL87119)	Phandakalan, Sehore road, Bhopal, India.	23.2395	77.2369	ICAR-Indian Institute of Soil Science, Bhopal, Madhya Pradesh, India
BRP16	P2F2-2(3)	Cajanus cajan cv Asha (ICPL87119)	IISS (Indian Institute of Soil Science), Bhopal, India.	23.3069	77.4091	ICAR-Indian Institute of Soil Science, Bhopal, Madhya Pradesh, India
BRP17	IK-4	Cajanus cajan cv Asha (ICPL87119)	Eintkhedi, Berasia road, Bhopal, India.	23.3675	77.4	ICAR-Indian Institute of Soil Science, Bhopal, Madhya Pradesh, India
BRP19	DG -4 (2)	Cajanus cajan cv Asha (ICPL87119)	Diwanganj, Vidisha, India.	23.425	77.571	ICAR-Indian Institute of Soil Science, Bhopal, Madhya Pradesh, India
BRP20	P1F2-1	Cajanus cajan cv Asha (ICPL87119)	IISS (Indian Institute of Soil Science), Bhopal, India.	23.2599	77.4126	ICAR-Indian Institute of Soil Science, Bhopal, Madhya Pradesh, India
BRP21	IK-4(2)	Cajanus cajan cv Asha (ICPL87119)	Eintkhedi, Berasia road, Bhopal, India.	23.4564	77.3567	ICAR-Indian Institute of Soil Science, Bhopal, Madhya Pradesh, India
BRP22	NK-4	Cajanus cajan cv Asha (ICPL87119)	Nipaniya kalan, Sehore road, Bhopal, India.	23.3	77.024	ICAR-Indian Institute of Soil Science, Bhopal, Madhya Pradesh, India
BRP23	P1-3(4)	Cajanus cajan cv Asha (ICPL87119)	IISS (Indian Institute of Soil Science), Bhopal, India.	23.3069	77.4091	ICAR-Indian Institute of Soil Science, Bhopal, Madhya Pradesh, India
BRP26	BK-2	Cajanus cajan cv Asha (ICPL87119)	Bhadakhedi, Ashta, India.	23.0807	76.5519	ICAR-Indian Institute of Soil Science, Bhopal, Madhya Pradesh, India
BRP27	BISPUN3-1	Cajanus cajan cv Asha (ICPL87119)	IISS (Indian Institute of Soil Science), Bhopal, India.	23.3069	77.4091	ICAR-Indian Institute of Soil Science, Bhopal, Madhya Pradesh, India
BRP28	F4	Cajanus cajan cv Asha (ICPL87119)	IISS (Indian Institute of Soil Science), Bhopal, India.	23.2599	77.4126	ICAR-Indian Institute of Soil Science, Bhopal, Madhya Pradesh, India
BRP29	KHERI	Cajanus cajan cv Asha (ICPL87119)	Kheri, Sehore, India.	23.112	77.006	ICAR-Indian Institute of Soil Science, Bhopal, Madhya Pradesh, India
BRP30	P1 -3	Cajanus cajan cv Asha (ICPL87119)	IISS (Indian Institute of Soil Science), Bhopal, India.	23.3069	77.4091	ICAR-Indian Institute of Soil Science, Bhopal, Madhya Pradesh, India
BRP31	KOTHRI-1(1)I	Cajanus cajan cv Asha (ICPL87119)	Kothri, Ashta, India.	23.0653	76.8134	ICAR-Indian Institute of Soil Science, Bhopal, Madhya Pradesh, India
BRP32	IK-3 (2)	Cajanus cajan cv Asha (ICPL87119)	Nipaniya kalan, Sehore road, Bhopal, India.	23.3	77.024	ICAR-Indian Institute of Soil Science, Bhopal, Madhya Pradesh, India
BRP33	NK-1(2)	Cajanus cajan cv Asha (ICPL87119)	Nipaniya kalan, Sehore road, Bhopal, India.	23.3	77.024	ICAR-Indian Institute of Soil Science, Bhopal, Madhya Pradesh, India
BRP34	KHOKRI-2	Cajanus cajan cv Asha (ICPL87119)	Khokhari, Ashta, India.	23.0901	76.5736	ICAR-Indian Institute of Soil Science, Bhopal, Madhya Pradesh, India
BRP36	SP SMALL-3(1)	Cajanus cajan cv Asha (ICPL87119)	Salamatpur, Vidisha, India.	23.459	77.665	ICAR-Indian Institute of Soil Science, Bhopal, Madhya Pradesh, India
BRP37	VB-4	Cajanus cajan cv Asha (ICPL87119)	Vidisha bypass, Bhopal, India.	23.3438	77.4799	ICAR-Indian Institute of Soil Science, Bhopal, Madhya Pradesh, India
BRP38	NK-1(4)	Cajanus cajan cv Asha (ICPL87119)	Nipaniya kalan, Sehore road, Bhopal, India.	23.3	77.024	ICAR-Indian Institute of Soil Science, Bhopal, Madhya Pradesh, India
BRP39	KR-4	Cajanus cajan cv Asha (ICPL87119)	Khajoori road, Sehore, India.	23.2457	77.254	ICAR-Indian Institute of Soil Science, Bhopal, Madhya Pradesh, India
BRP40	NJ10	Cajanus cajan cv Asha (ICPL87119)	Nipaniya jat, Berasia road, Bhopal, India.	23.4075	77.3991	ICAR-Indian Institute of Soil Science, Bhopal, Madhya Pradesh, India
BRP42	KRM	Cajanus cajan cv Asha (ICPL87119)	Kilerama, Ashta, India.	23.0408	76.7509	ICAR-Indian Institute of Soil Science, Bhopal, Madhya Pradesh, India
BRP43	MP-2(2)	Cajanus cajan cv Asha (ICPL87119)	Malipura, Ashta, India.	23.0131	76.4117	ICAR-Indian Institute of Soil Science, Bhopal, Madhya Pradesh, India
BRP44	DODI-4(1)	Cajanus cajan cv Asha (ICPL87119)	Dodi, Ashta, India.	23.002	76.345	ICAR-Indian Institute of Soil Science, Bhopal, Madhya Pradesh, India
BRP45	Sehore road	Cajanus cajan cv Asha (ICPL87119)	Sehore district field, India.	22.9473	77.1025	ICAR-Indian Institute of Soil Science, Bhopal, Madhya Pradesh, India
BRP46	BK-4(2)	Cajanus cajan cv Asha (ICPL87119)	Bhadakhedi, Ashta, India.	23.0807	76.5519	ICAR-Indian Institute of Soil Science, Bhopal, Madhya Pradesh, India
BRP47	MP-1(1)	Cajanus cajan cv Asha (ICPL87119)	Malipura, Ashta, India.	23.0131	76.4117	ICAR-Indian Institute of Soil Science, Bhopal, Madhya Pradesh, India
BRP48	MPS2-3(B)	Cajanus cajan cv Asha (ICPL87119)	Parwaliya, Bhopal, India.	23.3342	77.2803	ICAR-Indian Institute of Soil Science, Bhopal, Madhya Pradesh, India
BRP50	PR2F2N3-2 (3)	Cajanus cajan cv Asha (ICPL87119)	Parwaliya, Bhopal, India.	23.3365	77.2622	ICAR-Indian Institute of Soil Science, Bhopal, Madhya Pradesh, India
BRP51	RG large	Cajanus cajan cv Asha (ICPL87119)	Rafiqganj, Sehore, India.	22.8152	77.1686	ICAR-Indian Institute of Soil Science, Bhopal, Madhya Pradesh, India
BRP52	PK small -1	Cajanus cajan cv Asha (ICPL87119)	Phandakalan, Sehore road, Bhopal, India.	23.2395	77.2369	ICAR-Indian Institute of Soil Science, Bhopal, Madhya Pradesh, India
BRP54	Kothri -1	Cajanus cajan cv Asha (ICPL87119)	Kothri, Ashta, India.	23.0653	76.8134	ICAR-Indian Institute of Soil Science, Bhopal, Madhya Pradesh, India
BRP55	SP Large -1	Cajanus cajan cv Asha (ICPL87119)	Salamatpur, Vidisha, India.	23.459	77.665	ICAR-Indian Institute of Soil Science, Bhopal, Madhya Pradesh, India
BRP56	Duraha	Cajanus cajan cv Asha (ICPL87119)	Parwaliya, Bhopal, India.	23.3365	77.2622	ICAR-Indian Institute of Soil Science, Bhopal, Madhya Pradesh, India
NBAIM01	na	Cajanus cajan cv Bahar	Katherua, Uttar Pradesh, India.	26.291	80.256	ICAR-National Bureau for Agriculturally Important Microorganism. Kushmaur, Uttar Pradesh. India
NBAIM02	na	Cajanus cajan cv Bahar	Shahpur Pira, Punjab, India.	31.479	75.374	ICAR-National Bureau for Agriculturally Important Microorganism. Kushmaur, Uttar Pradesh. India
NBAIM03	na	Cajanus cajan cv Bahar	Shahpur Pira, Punjab, India.	31.479	75.374	ICAR-National Bureau for Agriculturally Important Microorganism. Kushmaur, Uttar Pradesh. India
NBAIM04	na	Cajanus cajan cv Bahar	Phillaur, Punjab, India.	31.022	75.778	ICAR-National Bureau for Agriculturally Important Microorganism. Kushmaur, Uttar Pradesh. India
NBAIM05	na	Cajanus cajan cv Bahar	Jandiala, Punjab, India.	31.224	75.957	ICAR-National Bureau for Agriculturally Important Microorganism. Kushmaur, Uttar Pradesh. India
NBAIM06	na	Cajanus cajan cv Bahar	Onhaich, Uttar Pradesh, India.	25.893	83.481	ICAR-National Bureau for Agriculturally Important Microorganism. Kushmaur, Uttar Pradesh. India
NBAIM07	na	Cajanus cajan cv Bahar	Ghazipur, Uttar Pradesh, India.	25.591	83.592	ICAR-National Bureau for Agriculturally Important Microorganism. Kushmaur, Uttar Pradesh. India
NBAIM08	na	Cajanus cajan cv Bahar	Ashakhera, Uttar Pradesh, India.	26.634	80.714	ICAR-National Bureau for Agriculturally Important Microorganism. Kushmaur, Uttar Pradesh. India
NBAIM09	na	Cajanus cajan cv Bahar	Rasra, Uttar Pradesh, India.	25.853	83.851	ICAR-National Bureau for Agriculturally Important Microorganism. Kushmaur, Uttar Pradesh. India
NBAIM10	na	Cajanus cajan cv Bahar	Rasra, Uttar Pradesh, India.	25.853	83.851	ICAR-National Bureau for Agriculturally Important Microorganism. Kushmaur, Uttar Pradesh. India
NBAIM11	na	Cajanus cajan cv Bahar	Ghazipur, Uttar Pradesh, India.	25.591	83.592	ICAR-National Bureau for Agriculturally Important Microorganism. Kushmaur, Uttar Pradesh. India
NBAIM12	na	Cajanus cajan cv Bahar	Rasra, Uttar Pradesh, India.	25.853	83.851	ICAR-National Bureau for Agriculturally Important Microorganism. Kushmaur, Uttar Pradesh. India
NBAIM13	na	Cajanus cajan cv Bahar	Ashakhera, Uttar Pradesh, India.	26.634	80.714	ICAR-National Bureau for Agriculturally Important Microorganism. Kushmaur, Uttar Pradesh. India
NBAIM14	na	Cajanus cajan cv Bahar	Jajja, Punjab, India.	31.752	74.682	ICAR-National Bureau for Agriculturally Important Microorganism. Kushmaur, Uttar Pradesh. India
NBAIM15	na	Cajanus cajan cv Bahar	Piyari, Uttar Pradesh, India.	25.404	83.056	ICAR-National Bureau for Agriculturally Important Microorganism. Kushmaur, Uttar Pradesh. India
NBAIM16	na	Cajanus cajan cv Bahar	Ludhiana, Punjab, India.	30.866	75.858	ICAR-National Bureau for Agriculturally Important Microorganism. Kushmaur, Uttar Pradesh. India
NBAIM17	na	Cajanus cajan cv Bahar	Onhaich, Uttar Pradesh, India.	25.893	83.481	ICAR-National Bureau for Agriculturally Important Microorganism. Kushmaur, Uttar Pradesh. India
NBAIM18	na	Cajanus cajan cv Bahar	Saharanpur, Uttar Pradesh, India.	29.965	77.556	ICAR-National Bureau for Agriculturally Important Microorganism. Kushmaur, Uttar Pradesh. India
NBAIM19	na	Cajanus cajan cv Bahar	Yosufpur, Uttar Pradesh, India.	29.845	77.621	ICAR-National Bureau for Agriculturally Important Microorganism. Kushmaur, Uttar Pradesh. India
NBAIM20	na	Cajanus cajan cv Bahar	Saharanpur, Uttar Pradesh, India.	29.965	77.556	ICAR-National Bureau for Agriculturally Important Microorganism. Kushmaur, Uttar Pradesh. India
NBAIM21	na	Cajanus cajan cv Bahar	Hisampur Majra, Uttar Pradesh, India.	29.698	77.633	ICAR-National Bureau for Agriculturally Important Microorganism. Kushmaur, Uttar Pradesh. India
NBAIM22	na	Cajanus cajan cv Bahar	Muzaffarnagar, Uttar Pradesh, India.	29.466	77.701	ICAR-National Bureau for Agriculturally Important Microorganism. Kushmaur, Uttar Pradesh. India
NBAIM23	na	Cajanus cajan cv Bahar	Mustafabad, Uttar Pradesh, India.	27.137	81.518	ICAR-National Bureau for Agriculturally Important Microorganism. Kushmaur, Uttar Pradesh. India
NBAIM24	na	Cajanus cajan cv Bahar	Azamgarh, Uttar Pradesh, India.	26.061	83.168	ICAR-National Bureau for Agriculturally Important Microorganism. Kushmaur, Uttar Pradesh. India
NBAIM25	na	Cajanus cajan cv Bahar	Saharanpur, Uttar Pradesh, India.	29.981	77.577	ICAR-National Bureau for Agriculturally Important Microorganism. Kushmaur, Uttar Pradesh. India
NBAIM26	na	Cajanus cajan cv Bahar	Baghpat, Uttar Pradesh, India.	28.943	77.217	ICAR-National Bureau for Agriculturally Important Microorganism. Kushmaur, Uttar Pradesh. India
NBAIM27	na	Cajanus cajan cv Bahar	Ashakhera, Uttar Pradesh, India.	26.634	80.714	ICAR-National Bureau for Agriculturally Important Microorganism. Kushmaur, Uttar Pradesh. India
NBAIM28	na	Cajanus cajan cv Bahar	Ratanpura, Uttar Pradesh, India.	25.938	83.742	ICAR-National Bureau for Agriculturally Important Microorganism. Kushmaur, Uttar Pradesh. India
NBAIM29	na	Cajanus cajan cv Bahar	Jandiala, Punjab, India.	31.224	75.957	ICAR-National Bureau for Agriculturally Important Microorganism. Kushmaur, Uttar Pradesh. India
NBAIM30	na	Cajanus cajan cv Bahar	Azamgarh, Uttar Pradesh, India.	26.061	83.168	ICAR-National Bureau for Agriculturally Important Microorganism. Kushmaur, Uttar Pradesh. India
NBAIM31	na	Cajanus cajan cv Bahar	Onhaich, Uttar Pradesh, India.	25.893	83.481	ICAR-National Bureau for Agriculturally Important Microorganism. Kushmaur, Uttar Pradesh. India
NBAIM32	na	Cajanus cajan cv Bahar	Onhaich, Uttar Pradesh, India.	25.893	83.481	ICAR-National Bureau for Agriculturally Important Microorganism. Kushmaur, Uttar Pradesh. India
IC4061	KA-1; IC-3513; IHP 513	Pongamia pinnata	Kanpur, Uttar Pradesh. India	26.4526	80.3027	ICRISAT. Patancheru, Hyderabad, Telangana. India
IC4060	F4; IHP 512	Pongamia pinnata	IARI, New Delhi, Haryana. India	28.6334	77.1525	ICRISAT. Patancheru, Hyderabad, Telangana. India
IC3069	IHP 69	Indigofera glandulosa	Patancheru, Hyderabad, Telangana. India	17.5179	78.2607	ICRISAT. Patancheru, Hyderabad, Telangana. India
IC4059	CC-1; IHP 511	Pongamia pinnata	Tamil Nadu. India	11.2094	78.4854	ICRISAT. Patancheru, Hyderabad, Telangana. India
IC3195	IHP 195	Macroptilium atropurpureum	Patancheru, Hyderabad, Telangana. India	17.5179	78.2607	ICRISAT. Patancheru, Hyderabad, Telangana. India
IC3123	IHP123	Arachis hypogaea	Pune, Maharashtra. India	18.522	73.8551	ICRISAT. Patancheru, Hyderabad, Telangana. India
IC3342	IHP 342	Macroptilium atropurpureum	Patancheru, Hyderabad, Telangana. India	17.5179	78.2607	ICRISAT. Patancheru, Hyderabad, Telangana. India
IC4062	BDNA-2, IC-3514, IHP 514	ND	Badnapur, Maharshtra. India	19.8676	75.724	ICRISAT. Patancheru, Hyderabad, Telangana. India
Abbreviations: Na, not applicable; M.K.K., Mannem Konda Kandi; ND, not determined.
