# Supplementary material for: Genomic Diversity of Pigeon Pea (Cajanus cajan L. Millsp.) Endosymbionts in India and Selection of Potential Strains for Use as Agricultural Inoculants
Source: Front Plant Sci. 2021 Sep 7;12:680981. doi: 10.3389/fpls.2021.680981 (PMC8453007; doi:10.3389/fpls.2021.680981)
Supplement: Supplementary file 6 [file Table_2.xlsx]

## Sheet: Supplementary Table S2
Supplementary Table S2. General genomic characteristics of the bacterial genomes sequenced compared with IC strains.
Species	Strain	Genbank Biosample ID	Genome size (bp)	No. of contigs	No. of contigs > 1Kb	N50	Largest contig size (bp)	GC-content (%)	Total genes	Protein-coding genes (CDS)	No. rRNA clusters (*)	tRNAs	other rRNA	parAB	repABC clusters
Bradyrhizobium yuanmingense	BRP05	SAMN16844654	8265350	886	79	662572	1348823	63.08	7749	7682	1	62	1	1	0
Ensifer sp.	BRP08	SAMN16844655	7299169	159	100	341271	999840	61.27	7024	6966	3	55	1	1	3
Bradyrhizobium yuanmingense	BRP09	SAMN16844656	8254391	166	99	204514	578985	63.81	7766	7714	1	51	1	1	0
Ensifer aridi	BRP14	SAMN16844657	6885913	140	98	409086	946410	61.68	6621	6562	4	56	1	1	3
Bradyrhizobium yuanmingense	BRP19	SAMN16844658	8206068	274	80	526170	1149483	63.79	7676	7620	1	53	1	1	0
Bradyrhizobium yuanmingense	BRP20	SAMN16844659	8075916	152	79	401262	981782	63.8	7548	7494	1	51	1	1	0
Bradyrhizobium sp.	BRP22	SAMN16844660	8345172	197	100	164866	506563	62.76	7915	7863	1	51	1	1	0
Bradyrhizobium yuanmingense	BRP23	SAMN16844661	7925399	85	46	514726	901744	63.92	7431	7378	1	50	1	1	0
Bradyrhizobium brasilense	BRP56	SAMN16844662	9186568	277	174	100027	379665	63.75	8602	8546	1	53	1	1	0
Bradyrhizobium yuanmingense	NBAIM01	SAMN16844663	7770436	55	30	515068	1457026	63.96	7233	7184	1	48	1	1	0
Bradyrhizobium yuanmingense	NBAIM02	SAMN16844664	7862581	108	46	418886	1862573	63.93	7332	7280	1	49	1	1	0
Bradyrhizobium yuanmingense	NBAIM03	SAMN16844665	7999185	312	90	232287	567795	63.86	7523	7466	1	54	1	1	0
Bradyrhizobium yuanmingense	NBAIM08	SAMN16844666	8227117	1436	49	636710	1233366	63.74	8015	7955	1	56	1	1	0
Bradyrhizobium yuanmingense	NBAIM14	SAMN16844667	7903507	135	67	295424	1249464	63.91	7375	7322	1	50	1	1	0
Bradyrhizobium yuanmingense	NBAIM16	SAMN16844668	7855568	112	65	294527	965391	63.92	7331	7279	1	49	1	1	0
Bradyrhizobium yuanmingense	NBAIM18	SAMN16844669	7936904	99	64	404147	823993	63.94	7459	7405	1	53	1	1	0
Bradyrhizobium yuanmingense	NBAIM20	SAMN16844670	7945902	463	141	109355	335396	63.95	7568	7512	1	55	1	1	0
Ensifer alkalisoli	NBAIM29	SAMN16844671	6511321	133	93	195435	469545	61.91	6123	6066	4	54	1	1	3
Bradyrhizobium yuanmingense	NBAIM32	SAMN16844672	7605720	160	110	139266	459374	64.07	7109	7055	2	53	1	1	0
Bradyrhizobium yuanmingense	IC4061	SAMN16844673	7975140	58	53	477542	882229	63.8	7435	7374	1	57	na	1	0
Bradyrhizobium yuanmingense	IC4060	SAMN16844674	7974386	68	57	458309	1470262	63.81	7454	7393	1	57	na	1	0
Bradyrhizobium yuanmingense	IC3069	SAMN16844675	7942422	42	39	538640	921933	63.84	7410	7353	2	53	na	1	0
Bradyrhizobium yuanmingense	IC4059	SAMN16844676	7942313	43	38	539399	1300620	63.84	7408	7351	1	53	na	1	0
Bradyrhizobium yuanmingense	IC3195	SAMN16844677	7988394	87	78	272715	755202	63.82	7406	7353	1	49	na	1	0
Bradyrhizobium yuanmingense	IC3123	SAMN16844678	8065303	59	49	649280	1104862	63.78	7527	7473	1	50	na	1	0
Ensifer sp.	IC3342	SAMN16844679	7412829	87	76	474327	1717110	61.27	7097	7039	4	54	na	1	2
Ensifer sp.	IC4062	SAMN16844680	7115880	83	73	283444	577002	60.98	6785	6726	6	55	na	1	2
Abbreviations: Na, not annotated.
