# Supplementary material for: Genomic Diversity of Pigeon Pea (Cajanus cajan L. Millsp.) Endosymbionts in India and Selection of Potential Strains for Use as Agricultural Inoculants
Source: Front Plant Sci. 2021 Sep 7;12:680981. doi: 10.3389/fpls.2021.680981 (PMC8453007; doi:10.3389/fpls.2021.680981)
Supplement: Supplementary file 7 [file Table_3.xlsx]

## Sheet: Supplementary Table S3
Supplementary Table S3. Locus tag and BioSample number of strains used for phylogenetic, phylogenomic and genomic analyses.
Strain	Host	nodC	Genome (Genebank biosample)
Bradyrhizobium yuanmingense BRP05	Cajanus cajan	23855_BRP05_06578	SAMN16844654
Ensifer sp. BRP08	Cajanus cajan	23856_BRP08_06050	SAMN16844655
Bradyrhizobium yuanmingense BRP09	Cajanus cajan	24876_BRP09_06360	SAMN16844656
Ensifer aridi BRP14	Cajanus cajan	23857_BRP14_04743	SAMN16844657
Bradyrhizobium yuanmingense BRP19	Cajanus cajan	23858_BRP19_06447	SAMN16844658
Bradyrhizobium yuanmingense BRP20	Cajanus cajan	23859_BRP20_06269	SAMN16844659
Bradyrhizobium sp. BRP22	Cajanus cajan	24878_BRP22_06013	SAMN16844660
Bradyrhizobium yuanmingense BRP23	Cajanus cajan	23860_BRP23_05827	SAMN16844661
Bradyrhizobium brasilense BRP56	Cajanus cajan	23862_BRP56_07274	SAMN16844662
Bradyrhizobium yuanmingense NBAIM01	Cajanus cajan	24903_NBAIM01_00944	SAMN16844663
Bradyrhizobium yuanmingense NBAIM02	Cajanus cajan	23863_NBAIM02_05692	SAMN16844664
Bradyrhizobium yuanmingense NBAIM03	Cajanus cajan	23864_NBAIM03_05456	SAMN16844665
Bradyrhizobium yuanmingense NBAIM08	Cajanus cajan	23865_NBAIM08_06825	SAMN16844666
Bradyrhizobium yuanmingense NBAIM14	Cajanus cajan	23867_NBAIM14_05371	SAMN16844667
Bradyrhizobium yuanmingense NBAIM16	Cajanus cajan	23868_NBAIM16_05024	SAMN16844668
Bradyrhizobium yuanmingense NBAIM18	Cajanus cajan	24882_NBAIM18_01835	SAMN16844669
Bradyrhizobium yuanmingense NBAIM20	Cajanus cajan	24883_NBAIM20_02466	SAMN16844670
Ensifer alkalisoli NBAIM29	Cajanus cajan	23870_NBAIM29_05498	SAMN16844671
Bradyrhizobium yuanmingense NBAIM32	Cajanus cajan	24884_NBAIM32_06267	SAMN16844672
Bradyrhizobium yuanmingense IC4061	Pongamia pinnata	7464_IC4061_06070	SAMN16844673
Bradyrhizobium yuanmingense IC4060	Pongamia pinnata	7463_IC4060_06777	SAMN16844674
Bradyrhizobium yuanmingense IC3069	Indigofera glandulosa	7457_IC3069_02021	SAMN16844675
Bradyrhizobium yuanmingense IC4059	Pongamia pinnata	7462_IC4059_02265	SAMN16844676
Bradyrhizobium yuanmingense IC3195	Macroptilium atropurpureum	7460_IC3195_04892	SAMN16844677
Bradyrhizobium yuanmingense IC3123	Arachis hypogaea	7459_IC3123_06464	SAMN16844678
Ensifer sp. IC3342	Macroptilium atropurpureum	7461_IC3342_06425	SAMN16844679
Ensifer sp IC4062	unknown	7465_IC4062_02248	SAMN16844680
Bradyrhiobium yuanmingense CGMCC 1.3531	Lespedeza cuneata	IQ15_RS34185	SAMN02927896
Bradyrhiobium cajani AMBPC1010T	Cajanus cajan	GPL20_RS10325	SAMN13489115
Bradyrhiobium japonicum USDA 6T	Glycine max	BJ6T_RS44350	SAMD00060992
Bradyrhiobium ivorense CI-1BT	Cajanus cajan	CI41S_RS15760	SAMEA5315725
Bradyrhiobium elkanii USDA 76T	Glycine max	BRAEL_RS0116955	SAMN03775588
Bradyrhiobium brasilense UFLA 03-321T	Vigna unguiculata	BSN85_RS22130	SAMN06050723
Ensifer terangae USDA 4894T	Senegalia laeta	GHK62_RS13205	SAMN00766441
Ensifer fredii NBRC 14780T	Glycine max	EFR01_RS29595	SAMD00097544
Ensifer aridi LMR001T	Phaseolus filiformis	AYK65_RS18860	SAMN04455909
Ensifer alkalisoli YIC4027T	Sesbania cannabina	EKH55_RS27140	SAMN10600730
Cupriavidus taiwanensis LMG 19424T	Mimosa sp.	RALTA_RS29630	SAMEA3138280
Bradyrhizobium neotropicale BR 10247T	Centrolobium parense	AXW67_RS24970	SAMN04457964
Bradyrhizobium icense LMRT 13T	Phaseolus lunatus	LMTR13_RS24835	SAMN05230120
Bradyrhizobium paxllaeri LMRT 21T	Phaseolus lunatus	LMTR21_RS24680	SAMN05230119
Bradyrhizobium centrolobii BR 10245T	Centrolobium parense	AYJ54_RS18225	SAMN04448272
Bradyrhizobium namibiense 5-10T	ND	NAV	NAV
Bradyrhizobium liaoningense 2281T (USDA 3622)	ND	NAV	NAV
Bradyrhizobium pachyrhizi PAC 48T	Pachyrhizus erosus	AKL29_RS10455	SAMN03782120
Bradyrhizobium tropiciagri SEMIA 6148T	Neonotonia wightii	AKN84_RS14195	SAMN03784761
Bradyrhizobium elkanii CI-36E	Cajanus cajan	NAV	NAV
Bradyrhizobium elkanii CI-36B	Cajanus cajan	NAV	NAV
Bradyrhizobium elkanii CI-15C	Cajanus cajan	NAV	NAV
Bradyrhizobium sp. CI-41A	Cajanus cajan	NAV	NAV
Rhizobium sp. CI-5B	Cajanus cajan	NAV	NAV
Rhizobium sp. CI-39Bx	Cajanus cajan	NAV	NAV
Rhizobium alamii GBV016T	ND	NAV	NAV
Rhizobium mesosinicum CCBAU 25010T	ND	NAV	NAV
Ensifer sojae CCBAU 05684T	Glycine max	IC28_RS27090	SAMN07445560
Ensifer fredii CCBAU 45436	Glycine max	AB395_RS30560	SAMN03761948
Ensifer fredii CCBAU 25509	Glycine max	AOX55_RS32025	SAMN03761947
Ensifer fredii HH103	Glycyrrhiza uralensis	SFHH103_04510	SAMEA2272089
Ensifer fredii NGR234	Lablab purpureus	NGR_a03430	SAMN02603283
Ensifer fredii CCBAU 83666	Glycine max	SF83666_RS33340	SAMN07445561
Ensifer fredii USDA 257	Glycine soja	USDA257_RS32680	SAMN02641503
Bradyrhizobium elkanii SEMIA 587	Glycine max	FBF72_RS38870	SAMN11491112
Bradyrhizobium elkanii SEMIA 5019	Glycine max	FBF71_RS21265	SAMN11491066
Bradyrhizobium diazoefficiens SEMIA 5080	Glycine max	BJA5080_RS44185	SAMN02739028
Bradyrhizobium elkanii USDA 61	Glycine max	BE61_RS38105	SAMD00067082
Bradyrhizobium sp CCBAU 51753	Arachis hypogeae	XH93_RS10725	SAMN03459146
Bradyrhizobium sp CCBAU 53421	Arachis hypogeae	XH92_RS35215	SAMN03459145
Bradyrhizobium forestalis INPA54BT	Inga sp.	CVM73_RS31060	SAMN08035463
Bradyrhizobium frederickii CNPSo 3426T	Chamaecrista fasciculata	E4K64_RS34730	SAMN11254746
Bradyrhizobium shewense ERR111T	Erythrina brucei	GA0061098_RS39120	SAMEA104196492
Bradyrhizobium zhanjiangense CCBAU 51778T	Arachis hypogeae	XH85_RS13140	SAMN03459138
Bradyrhizobium diazoefficiens USDA 110T	Glycine max	blr2027	SAMN03573437
Bradyrhizobium diazoefficiens USDA 122	Glycine max	BD122_RS10615	SAMN04191488
Bradyrhizobium diazoefficiens NK6	Glycine max	NK6_RS51650	SAMD00022775
Bradyrhizobium diazoefficiens 113-2	Glycine max	HUW42_RS36555	SAMN15235935
Bradyrhizobium diazoefficiens 172S4	Amphicarpaea bracteate	HAU57_RS38285	SAMN14364959
Bradyrhizobium diazoefficiens F07S3	Glycine max	H7K76_RS11365	SAMD00204447
Bradyrhizobium diazoefficiens H12S4	Glycine max	H7K75_RS12280	SAMD00204445
Bradyrhizobium diazoefficiens HF08	Glycine max	H7K72_RS10205	SAMD00204446
Bradyrhizobium diazoefficiens HH115	Glycine max	H7K74_RS10770	SAMD00204444
Bradyrhizobium diazoefficiens XF7	Glycine max	DI395_RS11125	SAMN09205184
Bradyrhizobium ottawense OO99T	Glycine max	CIT37_RS02885	SAMN07448707
Bradyrhizobium japonicum J5	Glycine max	BKD09_RS41175	SAMN05890661
Bradyrhizobium japonicum E109	Glycine max	RN69_RS44150	SAMN03262953
Bradyrhizobium japonicum SEMIA 5079	Glycine max	BJS_RS45070	SAMN02726028
Bradyrhizobium japonicum 5038	Glycine max	HXT67_RS08965	SAMN15394813
Bradyrhizobium sp. CCBAU 51765	Arachis hypogeae	XH96_RS32145	SAMN03459149
Bradyrhizobium sp. LCT2	Lespedeza cuneata	EI171_RS39430	SAMN10475296
Bradyrhizobium sp. SG09	Glycine max	GDN72_RS37465	SAMD00179679
Bradyrhizobium vignae ORS3257	Vigna unguiculata	BRAD3257_RS31955	SAMEA104196492
Bradyrhizobium lupini DSM 30140T	Lupinus albus	Ga0415298_08_2213_3670	SAMN14908447
Bradyrhizobium macuxiense BR 10303T	Centrolobium parense	AS156_RS19835	SAMN04262301
Bradyrhizobium yuanmingense BR 3267	Vigna unguiculata	AOQ72_RS11000	SAMN04088257
Bradyrhizobium yuanmingense CCBAU 05623	Glycine max	IC58_RS34975	SAMN02469473
Bradyrhizobium yuanmingense CCBAU 25021	Glycine max	IC68_RS33560	SAMN02469474
Bradyrhizobium yuanmingense CCBAU 35157	Glycine max	IC46_RS35355	SAMN02469469
Bradyrhizobium yuanmingense CCBAU 10071T	Lespedeza cuneata	GA0061099_RS34190	SAMN04487810
Ensifer americanum CFNEI 156T	Acacia spp.	ATC00_RS22405	SAMN04274562
Ensifer meliloti 1021	Medicago sativa	SMa0866	SAMEA3283068
Bradyrhizobium liaoningense CCBAU 05525	Glycine max	IC32_RS31060	SAMN02469466
Bradyrhizobium liaoningense CCNWSX0360	Vigna unguiculata	A1D31_RS27735	SAMN04549276
Ensifer terangae SEMIA 6460	unkown	Ga0394399_5780	SAMN13166110
Bradyrhizobum sp. CCBAU 21365	Arachis hypogeae	XI02_RS11705	SAMN03459156
Bradyrhizobium arachidis CCBAU 51107T	Arachis hypogeae	WN72_RS10235	SAMN03451901
Ensifer meliloti USDA 1002T	Medicago sativa	CN067_RS32870	SAMN07640753
Ensifer medicae WSM419	Mecicago spp.	SMED_RS30390	SAMN02598363
Ensifer medicae USDA 1037T	Medicago truncatula	FB009_RS31645	SAMN11512017
Bradyrhizobium yuanmingense 3051	Cajanus cajan	GPL17_RS27440	SAMN13489117
Bradyrhizobium pachyrhizi 1040	Cajanus cajan	GPL21_RS32635	SAMN13489116
Abbreviations: ND, no data; NA, not applicable and NAV, not available.
