# Supplementary material for: Genomic Diversity of Pigeon Pea (Cajanus cajan L. Millsp.) Endosymbionts in India and Selection of Potential Strains for Use as Agricultural Inoculants
Source: Front Plant Sci. 2021 Sep 7;12:680981. doi: 10.3389/fpls.2021.680981 (PMC8453007; doi:10.3389/fpls.2021.680981)
Supplement: Supplementary file 8 [file Table_4.xlsx]

## Sheet: Supplementary Table S4
Supplementary Table S4. Locus tag and protein ID of the T3SS and nop genes used in analysis.
Strain	tssI	rhcU	rhcQ	nolV	nolU	nopA	nopB	nopL	nopM/nopM1	nopM2	nopM3	nopP/nopP1	nopP2	nopT1	nopT2	nopX	nopD	nopC	nopF	nopJ	nopE	nopAA	nopAC	nopAR
Ensifer sp.BRP08	23856_BRP08_05580	23856_BRP08_05554	23856_BRP08_05558	23856_BRP08_05561	23856_BRP08_05562	23856_BRP08_05549	23856_BRP08_05564	23856_BRP08_06594	23856_BRP08_06058					23856_BRP08_05430		23856_BRP08_05566		23856_BRP08_05990
Ensifer aridi BRP14	23857_BRP14_06285	23857_BRP14_05987	23857_BRP14_05983	23857_BRP14_05980	23857_BRP14_05979	23857_BRP14_05991	23857_BRP14_05977	23857_BRP14_06282	23857_BRP14_04726			23857_BRP14_05988				23857_BRP14_05975		23857_BRP14_05550
Ensifer sp IC3342	7461_IC3342_04460	7461_IC3342_04487	7461_IC3342_04483	7461_IC3342_04480	7461_IC3342_04479	7461_IC3342_05938	7461_IC3342_05953	7461_IC3342_06798	7461_IC3342_06433					7461_IC3342_04971		7461_IC3342_05955		7461_IC3342_05939
Ensifer sp.IC4062	7465_IC4062_05969	7465_IC4062_05943	7465_IC4062_05947	7465_IC4062_05950	7465_IC4062_05951	7465_IC4062_06190	7465_IC4062_06203	7465_IC4062_06534	7465_IC4062_05323			7465_IC4062_06192		7465_IC4062_04361		7465_IC4062_06205
Ensifer alkalisoli NBAIM29	23870_NBAIM29_06222	23870_NBAIM29_06193	23870_NBAIM29_06197	23870_NBAIM29_06200	23870_NBAIM29_06201	23870_NBAIM29_04493	23870_NBAIM29_04477	23870_NBAIM29_04465	23870_NBAIM29_05479			23870_NBAIM29_04488		23870_NBAIM29_04502		23870_NBAIM29_04475		23870_NBAIM29_04492
Bradyrhizobium yuanmingense BRP05	23855_BRP05_05197	23855_BRP05_05170	23855_BRP05_05174	23855_BRP05_05177	23855_BRP05_05178	23855_BRP05_05185			23855_BRP05_05202	23855_BRP05_06557	23855_BRP05_06556	23855_BRP05_05271	23855_BRP05_05237	23855_BRP05_06607		23855_BRP05_05183		23855_BRP05_05184				23855_BRP05_05322	23855_BRP05_06554
Bradyrhizobium yuanmingense BRP09	24876_BRP09_05360	24876_BRP09_05356	24876_BRP09_05352	24876_BRP09_05349	24876_BRP09_05348			24876_BRP09_05345		24876_BRP09_07235	24876_BRP09_07236	24876_BRP09_06767	24876_BRP09_07010	24876_BRP09_06377			24876_BRP09_05390				24876_BRP09_05344	24876_BRP09_07687	24876_BRP09_07239	24876_BRP09_05357
Bradyrhizobium yuanmingense BRP19	23858_BRP19_06653	23858_BRP19_06656	23858_BRP19_06660	23858_BRP19_06663	23858_BRP19_06664				23858_BRP19_06679	23858_BRP19_07591	23858_BRP19_07198	23858_BRP19_06748	23858_BRP19_06715	23858_BRP19_03418		23858_BRP19_06669		23858_BRP19_06670				23858_BRP19_07237	23858_BRP19_07195
Bradyrhizobium yuanmingense BRP20	23859_BRP20_05186	23859_BRP20_05183	23859_BRP20_05179	23859_BRP20_05176	23859_BRP20_05175				23859_BRP20_05159	23859_BRP20_07502	23859_BRP20_06927	23859_BRP20_05091	23859_BRP20_05124	23859_BRP20_06240		23859_BRP20_05170		23859_BRP20_05169				23859_BRP20_07429	23859_BRP20_06924
Bradyrhizobium sp. BRP22	24878_BRP22_03688	24878_BRP22_03685	24878_BRP22_03680	24878_BRP22_03677	24878_BRP22_03676	24878_BRP22_03670	24878_BRP22_03674		24878_BRP22_06026	24878_BRP22_03652	24878_BRP22_03651		24878_BRP22_03659	24878_BRP22_03690		24878_BRP22_03671	24878_BRP22_03711			24878_BRP22_05996		24878_BRP22_07181
Bradyrhizobium yuanmingense BRP23	23860_BRP23_04012	23860_BRP23_04015	23860_BRP23_04019	23860_BRP23_04022	23860_BRP23_04023				23860_BRP23_04046	23860_BRP23_05847	23860_BRP23_05848	23860_BRP23_04114	23860_BRP23_04080	23860_BRP23_05799		23860_BRP23_04028		23860_BRP23_04029				23860_BRP23_04165	23860_BRP23_05850
Bradyrhizobium brasilense BRP56	23862_BRP56_03598	23862_BRP56_03595	23862_BRP56_03591	23862_BRP56_03588	23862_BRP56_03587		23862_BRP56_03585		23862_BRP56_07286	23862_BRP56_0956	23862_BRP56_03565	23862_BRP56_01030	23862_BRP56_03528	23862_BRP56_01057		23862_BRP56_03579			23862_BRP56_07757			23862_BRP56_08419	23862_BRP56_07830
Bradyrhizobium yuanmingense NBAIM01	24903_NBAIM01_07071	24903_NBAIM01_07077	24903_NBAIM01_07081	24903_NBAIM01_07084	24903_NBAIM01_07085		24903_NBAIM01_07087	24903_NBAIM01_07089	24903_NBAIM01_06375	24903_NBAIM01_0969	24903_NBAIM01_0967	24903_NBAIM01_06422	24903_NBAIM01_06400	24903_NBAIM01_0918							24903_NBAIM01_07092	24903_NBAIM01_07054	24903_NBAIM01_0971
Bradyrhizobium yuanmingense NBAIM02	23863_NBAIM02_03924	23863_NBAIM02_03927	23863_NBAIM02_03931	23863_NBAIM02_03934	23863_NBAIM02_03935				23863_NBAIM02_03958	23863_NBAIM02_05712	23863_NBAIM02_05713	23863_NBAIM02_04027	23863_NBAIM02_03993	23863_NBAIM02_05665		23863_NBAIM02_03940		23863_NBAIM02_03941				23863_NBAIM02_04078	23863_NBAIM02_05715
Bradyrhizobium yuanmingense NBAIM03	23864_NBAIM03_06000	23864_NBAIM03_05997	23864_NBAIM03_05993	23864_NBAIM03_05990	23864_NBAIM03_05989				23864_NBAIM03_03852	23864_NBAIM03_05331	23864_NBAIM03_05332	23864_NBAIM03_03920	23864_NBAIM03_03887	23864_NBAIM03_06486		23864_NBAIM03_05984		23864_NBAIM03_05983				23864_NBAIM03_03965	23864_NBAIM03_05334
Bradyrhizobium yuanmingense NBAIM08	23865_NBAIM08_06698	23865_NBAIM08_06701	23865_NBAIM08_06705	23865_NBAIM08_06708	23865_NBAIM08_06709				23865_NBAIM08_06732	23865_NBAIM08_07192	23865_NBAIM08_07193	23865_NBAIM08_06802	23865_NBAIM08_06768	23865_NBAIM08_06855	23865_NBAIM08_06579	23865_NBAIM08_06714		23865_NBAIM08_06715				23865_NBAIM08_06095	23865_NBAIM08_07195
Bradyrhizobium yuanmingense NBAIM14	23867_NBAIM14_03399	23867_NBAIM14_03402	23867_NBAIM14_03406	23867_NBAIM14_03409	23867_NBAIM14_03410				23867_NBAIM14_03433	23867_NBAIM14_05350	23867_NBAIM14_05349	23867_NBAIM14_03502	23867_NBAIM14_03468	23867_NBAIM14_05399		23867_NBAIM14_03415		23867_NBAIM14_03416				23867_NBAIM14_03554	23867_NBAIM14_05347
Bradyrhizobium yuanmingense NBAIM16	23868_NBAIM16_06823	23868_NBAIM16_06826	23868_NBAIM16_06830	23868_NBAIM16_06833	23868_NBAIM16_06834				23868_NBAIM16_06365	23868_NBAIM16_05044	23868_NBAIM16_05045	23868_NBAIM16_06733	23868_NBAIM16_06699	23868_NBAIM16_04995		23868_NBAIM16_06839		23868_NBAIM16_06840				23868_NBAIM16_04306	23868_NBAIM16_05047
Bradyrhizobium yuanmingense NBAIM18	24882_NBAIM18_05026	24882_NBAIM18_05030	24882_NBAIM18_05034	24882_NBAIM18_05037	24882_NBAIM18_05038			24882_NBAIM18_05041		24882_NBAIM18_01857	24882_NBAIM18_01858	24882_NBAIM18_05124	24882_NBAIM18_05081	24882_NBAIM18_01818			24882_NBAIM18_02040				24882_NBAIM18_05042		24882_NBAIM18_01861	24882_NBAIM18_05029
Bradyrhizobium yuanmingense NBAIM20	24883_NBAIM20_01562	24883_NBAIM20_01566	24883_NBAIM20_01570	24883_NBAIM20_01573	24883_NBAIM20_01574			24883_NBAIM20_01577		24883_NBAIM20_02444	24883_NBAIM20_06218	24883_NBAIM20_01661	24883_NBAIM20_01618	24883_NBAIM20_02483			24883_NBAIM20_01522				24883_NBAIM20_01578		24883_NBAIM20_06215	24883_NBAIM20_01565
Bradyrhizobium yuanmingense NBAIM32	24884_NBAIM32_06955	24884_NBAIM32_06476	24884_NBAIM32_06480	24884_NBAIM32_06483	24884_NBAIM32_06484			24884_NBAIM32_06487		24884_NBAIM32_06250	24884_NBAIM32_06865	24884_NBAIM32_05337	24884_NBAIM32_05299	24884_NBAIM32_05409			24884_NBAIM32_06188				24884_NBAIM32_06489		24884_NBAIM32_06863	24884_NBAIM32_06958
Bradyrhizobium yuanmingense IC3069	7457_IC3069_04853	7457_IC3069_04857	7457_IC3069_04861	7457_IC3069_04864	7457_IC3069_04865			7457_IC3069_04868		7457_IC3069_02043	7457_IC3069_02044	7457_IC3069_04958	7457_IC3069_04908	7457_IC3069_02003			7457_IC3069_04827				7457_IC3069_04869		7457_IC3069_02047	7457_IC3069_04856
Bradyrhizobium yuanmingense IC3123	7459_IC3123_06342	7459_IC3123_06345	7459_IC3123_06349	7459_IC3123_06352	7459_IC3123_06353				7459_IC3123_06376	7459_IC3123_06485	7459_IC3123_06486	7459_IC3123_06444	7459_IC3123_06410	7459_IC3123_04921		7459_IC3123_06358		7459_IC3123_06359				7459_IC3123_05496	7459_IC3123_06488
Bradyrhizobium yuanmingense IC3195	7460_IC3195_05750	7460_IC3195_05763	7460_IC3195_05757	7460_IC3195_05760	7460_IC3195_05761				7460_IC3195_05873	7460_IC3195_04870	7460_IC3195_04869	7460_IC3195_05849	7460_IC3195_05817	7460_IC3195_07227		7460_IC3195_05766		7460_IC3195_05767				7460_IC3195_04613	7460_IC3195_04867
Bradyrhizobium yuanmingense IC4059	7462_IC4059_05009	7462_IC4059_05013	7462_IC4059_05017	7462_IC4059_05020	7462_IC4059_05021			7462_IC4059_05024		7462_IC4059_02243	7462_IC4059_02242	7462_IC4059_05114	7462_IC4059_05064	7462_IC4059_02283			7462_IC4059_04983				7462_IC4059_05025		7462_IC4059_02239	7462_IC4059_05012
Bradyrhizobium yuanmingense IC4060	7463_IC4060_02457	7463_IC4060_02461	7463_IC4060_02465	7463_IC4060_02468	7463_IC4060_02469			7463_IC4060_02472		7463_IC4060_06796	7463_IC4060_06797	7463_IC4060_02556	7463_IC4060_02513	7463_IC4060_06758			7463_IC4060_02412				7463_IC4060_02473		7463_IC4060_06800	7463_IC4060_02460
Bradyrhizobium yuanmingense IC4061	7463_IC4060_05961	7463_IC4060_05965	7463_IC4060_05969	7463_IC4060_05972	7463_IC4060_05973			7463_IC4060_05976		7463_IC4060_06699	7463_IC4060_06700	7463_IC4060_06060	7463_IC4060_06017	7463_IC4060_06661			7463_IC4060_05916				7463_IC4060_05977		7463_IC4060_06703	7463_IC4060_05964
Bradyrhizobium vignae ORS 3257T	BRAD3257_7742	BRAD3257_7745	BRAD3257_7750	BRAD3257_7753	BRAD3257_7754				BRAD3257_RS31400	BRAD3257_RS32085	BRAD3257_RS32090	BRAD3257_6978	BRAD3257_RS34260
Bradyrhizobium elkanii USDA 61						BE61_80180												BEL01nite_64320	BE61_91540
Bradyrhizobium japonicum USDA 6T							M4PSC1															BJ6T_81680	BJ6T_78570	BJ6T_79850
Bradyrhizobium diazoefficiens USDA 110T														blr2058	blr2140
Bradyrhizobium ivorense CI-1BT																A0A508T766
Bradyrhizobium sp. RP6																	AWS20424.1
Bradyrhizobium macuxiense BR 10355T																				FBZ93_12212
Bradyrhizobium yuanmingense CCBAU 10071T																					A0A1C3XGT1
Bradyrhizobium japonicum Is-34								MA20_46215
Ensifer fredii NGR234	NGR_a00800	NGR_a00580	NGR_a00620	NGR_a00650	NGR_a00660	NGR_a00550	NGR_a00680	NGR_a00770	NGR_a03640			NGR_a00570		NGR_a00490		NGR_a00700				NGR_a02610
Ensifer fredii HH103																		SFHH103_psfHH103d_3504
Ensifer fredii USDA 257																						AGH09926.1
