# Supplementary material for: Genomic Diversity of Pigeon Pea (Cajanus cajan L. Millsp.) Endosymbionts in India and Selection of Potential Strains for Use as Agricultural Inoculants
Source: Front Plant Sci. 2021 Sep 7;12:680981. doi: 10.3389/fpls.2021.680981 (PMC8453007; doi:10.3389/fpls.2021.680981)
Supplement: Supplementary file 9 [file Table_5.xlsx]

## Sheet: Supplementary Table S5
Supplementary Table S5. Box-PCR profiles of bacterial isolates.
Box-PCR profile	Selected for further testing	Strains showing same Box-PCR profile
a	HU01
b	HU04
c	HU11, BRP06	BRP01, BRP21
d	HU12, BRP30, NBAIM10	HU13, BRP11, NBAIM9, NBAIM11, NBAIM12, NBAIM13, NBAIM15
e	HU14
f	HU18	HU49
g	HU21	HU20, HU22, HU23, HU24, HU15,HU16, HU17, HU36
h	HU25
i	HU29, BRP04	BRP45, BRP42
j	HU34
k	HU35
l	HU37
m	HU39	HU40
n	HU44
o	HU50
p	HU53, BRP52	BRP47, BRP50, BRP54
q	HU55	HU54
r	HU56
s	HU57
t	HU59
u	BRP02
v	BRP05
w	BRP08	BRP16, BRP36, BRP3, BRP7, BRP10
x	BRP09
y	BRP14
z	BRP17
aa	BRP19
ab	BRP20, NBAIM32	BRP13, BRP26, BRP33
ac	BRP22
ad	BRP23	BRP27, BRP38
ae	BRP28
af	BRP32
ag	BRP34	BRP31
ah	BRP37
ai	BRP39	BRP29
aj	BRP40
ak	BRP43
al	BRP44
am	BRP46
an	BRP48
ao	BRP51
ap	BRP55
aq	BRP56
ar	NBAIM01
as	NBAIM02
at	NBAIM03	NBAIM4, NBAIM5
au	NBAIM07	NBAIM6
av	NBAIM08
aw	NBAIM14
ax	NBAIM16
ay	NBAIM17
az	NBAIM18
ba	NBAIM19
bb	NBAIM20	NBAIM21, NBAIM22, NBAIM23, NBAIM25, NBAIM26
bc	NBAIM24
bd	NBAIM27
be	NBAIM29	NBAIM28
bf	NBAIM30
bg	NBAIM31
