# Supplementary material for: Genomic Diversity of Pigeon Pea (Cajanus cajan L. Millsp.) Endosymbionts in India and Selection of Potential Strains for Use as Agricultural Inoculants
Source: Front Plant Sci. 2021 Sep 7;12:680981. doi: 10.3389/fpls.2021.680981 (PMC8453007; doi:10.3389/fpls.2021.680981)
Supplement: Supplementary file 10 [file Table_6.xlsx]

## Sheet: Supplementyary Table S6
Supplementyary Table S6. Performance of bacterial isolates on pigeon pea plants, assessing nodulation and impact on dry weight of plants.
Strain	Nodules present	Shoot dry weight (g)	Root dry weight (g)
HU01	-	0.05 ± 0.02	0.07 ± 0.02
HU04	-	0.22 ± 0.11	0.08 ± 0.04
HU11	-	0.06 ± 0.01	0.09 ± 0.02
HU12	-	0.17 ± 0.09	0.1 ± 0.02
HU14	-	0.26 ± 0.09	0.08 ± 0.03
HU18	-	0.14 ± 0.06	0.07 ± 0.04
HU21	-	0.2 ± 0.08	0.08 ± 0.03
HU25	-	0.22 ± 0.11	0.1 ± 0.04
HU29	-	0.05 ± 0.02	0.07 ± 0.03
HU34	-	0.15 ± 0.04	0.06 ± 0.03
HU35	-	0.16 ± 0.09	0.1 ± 0.02
HU37	-	0.06 ± 0.02	0.09 ± 0.03
HU39	-	0.38 ± 0.19	0.11 ± 0.02
HU44	-	0.06 ± 0.02	0.1 ± 0.03
HU50	-	0.05 ± 0.02	0.08 ± 0.03
HU53	-	0.05 ± 0.01	0.07 ± 0.02
HU55	-	0.06 ± 0.02	0.07 ± 0.02
HU56	-	0.05 ± 0.01	0.08 ± 0.04
HU57	-	0.07 ± 0.02	0.11 ± 0.03
HU59	-	0.06 ± 0.02	0.09 ± 0.03
NBAIM01	+	0.27 ± 0.01	0.08 ± 0.01
NBAIM02	+	0.22 ± 0.03	0.16 ± 0.01
NBAIM03	+	0.33 ± 0.02	0.17 ± 0.01
NBAIM07	-	0.09 ± 0.01	0.08 ± 0.02
NBAIM08	+	0.25 ± 0.02	0.15 ± 0.01
NBAIM10	-	0.31 ± 0.01	0.14 ± 0.01
NBAIM14	+	0.22 ± 0.01	0.09 ± 0.01
NBAIM16	+	0.24 ± 0.02	0.14 ± 0.01
NBAIM17	-	0.33 ± 0.02	0.11 ± 0.01
NBAIM18	+	0.25 ± 0.15	0.13 ± 0.04
NBAIM19	-	0.05 ± 0.02	0.08 ± 0.01
NBAIM20	+	0.18 ± 0.05	0.09 ± 0.04
NBAIM24	-	dead plant	dead plant
NBAIM27	-	0.09 ± 0.06	0.09 ± 0.04
NBAIM29	+	0.45 ± 0.11	0.12 ± 0.01
NBAIM31	-	0.07 ± 0.05	0.08 ± 0.05
NBAIM30	-	0.4 ± 0.03	0.16 ± 0.01
NBAIM32	+	0.3 ± 0.06	0.17 ± 0.03
BRP02	-	0.2 ± 0.09	0.1 ± 0.04
BRP04	-	0.15 ± 0.05	0.05 ± 0.02
BRP05	+	0.37 ± 0.12	0.21 ± 0.07
BRP06	-	0.07 ± 0.01	0.08 ± 0.03
BRP08	+	0.35 ± 0.18	0.12 ± 0.04
BRP09	+	0.3 ± 0.06	0.13 ± 0.03
BRP14	+	0.27 ± 0.07	0.1 ± 0.02
BRP17	-	0.08 ± 0.02	0.11 ± 0.02
BRP19	+	0.22 ± 0.08	0.1 ± 0.04
BRP20	+	0.3 ± 0.01	0.13 ± 0.02
BRP22	+	0.33 ± 0.08	0.18 ± 0.04
BRP23	+	0.33 ± 0.19	0.11 ± 0.05
BRP28	-	0.3 ± 0.07	0.12 ± 0.02
BRP30	-	0.07 ± 0.01	0.1 ± 0.01
BRP32	-	0.07 ± 0.02	0.1 ± 0.01
BRP34	-	0.08 ± 0.03	0.06 ± 0.03
BRP37	-	0.07 ± 0.02	0.11 ± 0.04
BRP39	-	0.31 ± 0.06	0.14 ± 0.03
BRP40	-	0.07 ± 0.02	0.07 ± 0.03
BRP43	-	0.07 ± 0.02	0.11 ± 0.06
BRP44	-	0.07 ± 0.02	0.1 ± 0.03
BRP46	-	0.11 ± 0.06	0.04 ± 0.01
BRP48	-	0.1 ± 0.06	0.06 ± 0.02
BRP51	-	0.15 ± 0.09	0.07 ± 0.02
BRP52	-	0.06 ± 0.01	0.07 ± 0.01
BRP55	-	0.07 ± 0.03	0.1 ± 0.04
BRP56	+	0.21 ± 0.04	0.14 ± 0.02
AMBPC1010T	+	0.21 ± 0.13	0.1 ± 0.03
AMBPC1011	+	0.22 ± 0.09	0.11 ± 0.03
IC3195	+	0.06 ± 0.01	0.08 ± 0.01
IC3342	+	0.05 ± 0.02	0.07 ± 0.01
IC4059	+	0.07 ± 0.01	0.08 ± 0.02
IC4060	+	0.08 ± 0.03	0.1 ± 0.02
IC4062	+	0.1 ± 0.04	0.1 ± 0.03
Water control	-	0.11 ± 0.04	0.08 ± 0.01
Shoot and root dry weight are expressed as mean ± standard deviation of 5 technical replicates
