# Supplementary material for: Genomic Diversity of Pigeon Pea (Cajanus cajan L. Millsp.) Endosymbionts in India and Selection of Potential Strains for Use as Agricultural Inoculants
Source: Front Plant Sci. 2021 Sep 7;12:680981. doi: 10.3389/fpls.2021.680981 (PMC8453007; doi:10.3389/fpls.2021.680981)
Supplement: Supplementary file 11 [file Table_7.xlsx]

## Sheet: Supplementary Table S7
Supplementary Table S7. Pairwise ANIm similarity matrix.
strain	BRP23	NBAIM32	IC3342	Bradyrhizobium_paxllaeri_LMTR_21T	IC4059	Bradyrhizobium_lupini_DSM_30140_T	Bradyrhizobium_shewense_ERR11_T	NBAIM02	Bradyrhizobium_cajani_AMBPC1010_T	Bradyrhizobium_yuanmingense_CCBAU10071T	Ensifer_medicae_USDA_1037T	Bradyrhizobium_yuanmingense_CGMCC_1-3531_T	Ensifer_terangae_SEMIA_6460_T	BRP02	Bradyrhizobium_ottawaense_strain_OO99_T	IC3123	Bradyrhizobium_macuxiense_BR_10303_T	BRP09	BRP19	Bradyrhizobium_japonicum_USDA_6_T	Ensifer_fredii_NBRC_14780_T	NBAIM08	Bradyrhizobium_liaoningense_CCNWSX0360	Bradyrhizobium_symbiodeficiens_strain_85S1MB_T	BRP22	BRP14	NBAIM24	IC3195	Ensifer_terangae_USDA4894T	Bradyrhizobium_brasilense_UFLA_03-321_T	Bradyrhizobium_arachidis_CCBAU051107	Ensifer_sojae_CBBAU_05684T	Ensifer_meliloti_USDA_1002T	Bradyrhizobium_neotropicale_BR_1024T	Bradyrhizobium_centrolobii_strain_BR_10245_T	IC4062	NBAIM14	Bradyrhizobium_icens_LMTR_13T	IC3100	BRP20	Bradyrhizobium_liaoningense_CCBAU_05525	NBAIM29	Bradyrhizobium_neotropicale_Cp5-3_T	IC4061	Bradyrhizobium_pachyrhizi_PAC_48_T	Bradyrhizobium_yuanmingense_3051.fasta	Cupriavidus_taiwanensis_LMG_19424_T	NBAIM20	Bradyrhizobium_liaoningense_CCBAU_83689
BRP23	100	97.97	83.87	84.73	97.83	88.47	89.01	98.37	88.87	98.33	82.37	98.33	83.32	98.44	89.02	98.45	85.17	97.63	98.21	88.49	83.18	98.44	90.15	88.73	85.2	84.19	83.54	98.19	84.25	85.4	88.78	83.44	82.76	87.51	87.58	84.13	98.38	84.69	82.53	98.19	90.08	83.92	87.51	97.89	85.38	95.93	81.68	96.73	90.07
NBAIM32	97.97	100	82.82	84.7	97.99	88.45	88.89	97.82	88.74	98.26	82.47	98.26	82.52	97.9	89.01	97.86	85.1	97.72	97.79	88.46	82.41	97.96	90.14	88.72	85.16	83.08	82.66	97.81	83.56	85.35	88.69	82.63	82.42	87.52	87.55	83.24	97.94	84.57	82.56	97.81	90.02	82.89	87.49	99.27	85.33	95.98	81.96	96.9	90.04
IC3342	83.92	82.95	100	83.67	84.15	83.84	83.55	84.03	83.61	82.97	84.82	82.96	91.17	83.78	83.43	84.08	82.6	84.11	84.07	83.97	85.93	84.1	82.77	82.8	83.36	86.8	86.05	84.01	91.23	83.24	83.59	85.59	85.43	84.45	84.25	92.23	84.05	84.3	85.29	83.95	83.84	85.97	84	83.98	83.68	82.5	81.63	84.32	83.84
Bradyrhizobium_paxllaeri_LMTR_21T	84.74	84.7	83.69	100	84.72	84.84	84.74	84.75	84.91	84.72	82.31	84.72	83.79	84.72	84.77	84.76	85.27	84.81	84.79	84.87	83.69	84.75	84.7	84.59	85.28	83.96	83.62	84.75	84.68	85.46	84.73	83.43	82.36	85.09	85.05	84.03	84.74	88.61	82.69	84.76	84.81	83.38	84.98	84.73	85.51	84.68	81.21	84.73	84.79
IC4059	97.82	97.99	84.03	84.72	100	88.43	88.84	97.72	88.74	97.91	82.49	97.91	83.56	97.79	88.97	97.82	85.05	97.92	97.83	88.45	83.11	97.76	90.09	88.73	84.97	83.87	83.55	97.79	84.4	85.3	88.64	83.31	82.83	87.51	87.49	84.18	97.88	84.59	82.65	97.85	90.06	83.96	87.48	98.11	85.28	95.82	81.54	97.05	90.08
Bradyrhizobium_lupini_DSM_30140_T	88.48	88.46	83.74	84.83	88.44	100	89.15	88.48	89.24	88.47	82.51	88.47	83.29	88.51	90.39	88.56	85.24	88.5	88.55	99.91	83.78	88.53	88.73	88.93	85.19	83.57	83.6	88.55	84.19	85.38	89.56	84.16	82.87	87.97	88.07	83.76	88.5	84.59	82.62	88.57	89.64	83.79	87.95	88.46	85.36	88.47	81.22	88.49	89.45
Bradyrhizobium_shewense_ERR11_T	89.04	88.9	83.56	84.74	88.86	89.15	100	89.02	89.53	88.93	82.37	88.93	83.19	89.04	94.91	89.03	85.07	88.89	89.05	89.17	83.26	89.04	89.34	91.82	85.02	83.71	83.31	89.05	84.01	85.38	89.16	83.6	82.64	87.78	87.75	83.73	89.05	84.58	82.59	89.05	89.46	83.62	87.77	88.99	85.3	88.9	81.44	88.91	89.46
NBAIM02	98.38	97.84	83.88	84.75	97.73	88.48	89	100	88.88	97.85	82.5	97.85	83.29	98.6	89.02	98.33	85.2	97.72	98.12	88.5	83.18	98.34	90.17	88.73	85.22	84.02	83.57	98.13	84.25	85.41	88.76	83.5	82.7	87.55	87.59	84.12	98.27	84.65	82.68	98.1	90.08	83.94	87.53	97.8	85.4	95.93	81.38	96.77	90.08
Bradyrhizobium_cajani_AMBPC1010_T	88.87	88.75	83.62	84.91	88.74	89.22	89.52	88.88	100	88.74	82.53	88.74	83.13	88.88	89.31	88.9	85.22	88.76	88.86	89.25	83.12	88.88	89.17	88.91	85.14	83.51	82.98	88.89	83.85	85.41	89.34	83.48	82.72	88.25	88.35	83.54	88.88	84.67	82.48	88.88	89.35	83.2	88.34	88.74	85.39	88.77	82.04	88.77	89.33
Bradyrhizobium_yuanmingense_CCBAU10071T	98.32	98.27	82.88	84.7	97.91	88.44	88.9	97.83	88.73	100	82.43	99.86	82.53	97.9	88.95	97.74	85.2	97.71	97.75	88.46	82.55	97.82	90.12	88.73	85.22	83.13	82.72	97.71	83.56	85.34	88.66	82.72	82.54	87.53	87.5	83.19	97.85	84.59	82.64	97.71	89.99	83.02	87.56	98	85.31	95.94	81.64	96.82	90.03
Ensifer_medicae_USDA_1037T	82.42	82.45	84.82	82.27	82.48	82.54	82.35	82.47	82.51	82.44	100	82.41	84.83	82.35	82.46	82.38	82.31	82.46	82.35	82.81	85.02	82.47	82.28	82.53	82.38	85.41	85.05	82.51	85.1	81.88	82.79	84.67	88.23	83.4	83.38	84.81	82.48	82.54	84.72	82.48	82.35	84.66	82.71	82.49	81.91	82.45	82.72	82.69	82.37
Bradyrhizobium_yuanmingense_CGMCC_1-3531_T	98.32	98.28	82.86	84.71	97.92	88.45	88.9	97.82	88.72	99.87	82.4	100	82.52	97.9	88.94	97.74	85.19	97.71	97.74	88.47	82.57	97.82	90.13	88.73	85.24	83.15	82.73	97.71	83.57	85.35	88.66	82.65	82.53	87.54	87.51	83.19	97.84	84.58	82.62	97.7	90.01	83.02	87.57	98	85.31	95.93	81.6	96.82	90.03
Ensifer_terangae_SEMIA_6460_T	83.24	82.44	91.15	83.9	83.5	83.3	83.15	83.25	83.07	82.48	84.84	82.47	100	83.43	83.26	83.37	82.79	83.42	83.39	83.49	85.87	83.29	82.59	82.52	83.25	85.91	85.82	83.25	99.91	83.03	83.02	85.39	85.47	84.16	83.99	90.85	83.33	84.57	85.4	83.34	83.48	85.49	83.67	83.4	83.11	82.47	81.4	83.39	83.42
BRP02	98.45	97.91	83.67	84.72	97.77	88.5	89.02	98.6	88.88	97.91	82.36	97.9	83.47	100	89.05	98.41	85.17	97.56	98.13	88.52	83.15	98.36	90.19	88.76	85.25	84.15	83.5	98.16	84.44	85.41	88.79	83.41	82.82	87.53	87.58	84.14	98.35	84.66	82.45	98.16	90.09	83.97	87.51	97.83	85.37	95.9	81.49	96.67	90.08
Bradyrhizobium_ottawaense_strain_OO99_T	89.02	89	83.37	84.76	88.96	90.38	94.88	89.01	89.31	88.96	82.46	88.95	83.23	89.04	100	89.06	85.1	89.06	89.08	90.59	83.5	89.09	89.36	91.9	85.15	83.74	83.3	89.09	84.14	85.37	89.15	84.59	82.63	87.83	87.79	83.45	89.04	84.64	82.49	89.12	90.37	83.76	87.79	89	85.28	88.95	81.35	89.01	89.99
IC3123	98.45	97.87	84.07	84.77	97.83	88.55	89.01	98.32	88.89	97.75	82.39	97.75	83.42	98.4	89.06	100	85.2	97.52	98.36	88.56	83.37	98.44	90.19	88.73	85.3	84.17	83.47	98.17	84.39	85.42	88.77	83.55	82.81	87.54	87.58	84.3	98.4	84.67	82.56	98.12	90.05	84.04	87.56	97.82	85.4	95.86	81.74	96.69	90.07
Bradyrhizobium_macuxiense_BR_10303_T	85.09	85.08	82.57	85.26	85.05	85.14	85.05	85.11	85.16	85.15	82.29	85.13	82.77	85.08	85.04	85.1	100	85.05	85.09	85.17	82.75	85.12	85.19	84.98	85.53	82.77	82.64	85.06	83.9	87.94	85.18	82.62	82.42	85.52	85.43	82.55	85.09	85	82.41	85.11	85.23	82.51	85.33	85.09	87.89	85.1	81.32	85.09	85.2
BRP09	97.63	97.72	84.09	84.8	97.89	88.48	88.87	97.7	88.74	97.72	82.5	97.72	83.48	97.57	89.07	97.53	85.14	100	97.75	88.5	83.25	97.57	90.16	88.73	85.25	83.84	83.77	97.55	84.29	85.36	88.68	83.46	82.84	87.57	87.5	84.14	97.56	84.63	82.5	97.51	90.11	83.95	87.62	97.9	85.33	95.87	81.76	97.14	90.11
BRP19	98.21	97.79	84	84.8	97.83	88.53	89.03	98.11	88.86	97.75	82.32	97.75	83.4	98.12	89.08	98.37	85.11	97.75	100	88.55	83.24	98.08	90.17	88.76	85.55	84.15	83.47	98.2	84.38	85.48	88.75	83.47	82.74	87.53	87.51	84.17	98.25	84.65	82.76	98.32	90.06	83.99	87.54	97.78	85.44	95.88	81.7	96.66	90.09
Bradyrhizobium_japonicum_USDA_6_T	88.48	88.45	83.86	84.86	88.44	99.85	89.15	88.48	89.25	88.47	82.8	88.47	83.42	88.52	90.58	88.55	85.26	88.5	88.55	100	84.2	88.53	88.72	88.93	85.19	83.7	83.73	88.56	84.8	85.41	89.56	84.8	83.05	87.99	88.08	83.92	88.5	84.62	82.82	88.56	89.82	83.95	87.97	88.46	85.37	88.48	81.24	88.48	89.46
Ensifer_fredii_NBRC_14780_T	83.22	82.43	85.93	83.73	83.14	83.77	83.22	83.16	83.16	82.59	85.02	82.57	85.86	83.18	83.51	83.4	82.76	83.29	83.27	84.2	100	83.23	82.75	82.67	83.25	86.33	92.25	83.18	86	83.02	83.08	86.71	85.79	83.85	83.95	85.94	83.12	83.34	85.37	83.24	83.88	85.78	83.66	83.05	82.96	82.5	81.07	83.3	83.89
NBAIM08	98.45	97.97	84.01	84.76	97.77	88.53	89.01	98.34	88.89	97.84	82.49	97.84	83.38	98.37	89.11	98.45	85.2	97.58	98.09	88.55	83.2	100	90.18	88.73	85.33	84.32	83.82	98.13	84.37	85.43	88.77	83.65	82.95	87.54	87.58	84.37	98.34	84.66	82.5	98.08	90.05	84.19	87.54	97.93	85.37	95.93	81.76	96.75	90.07
Bradyrhizobium_liaoningense_CCNWSX0360	90.16	90.13	82.77	84.71	90.1	88.71	89.35	90.17	89.18	90.14	82.3	90.14	82.68	90.19	89.37	90.2	85.26	90.18	90.17	88.72	82.79	90.18	100	88.98	85.17	82.98	82.91	90.19	83.57	85.41	88.89	82.72	82.7	87.79	87.77	82.91	90.19	84.62	82.48	90.21	94.75	82.88	87.78	90.11	85.36	90.16	81.48	90.14	94.87
Bradyrhizobium_symbiodeficiens_strain_85S1MB_T	88.71	88.71	82.78	84.58	88.72	88.92	91.78	88.72	88.89	88.72	82.57	88.72	82.52	88.75	91.88	88.72	84.96	88.72	88.74	88.93	82.63	88.72	88.97	100	84.87	82.41	82.79	88.73	83.59	85.23	88.79	82.8	82.43	87.48	87.53	82.48	88.73	84.44	82.35	88.72	89.09	82.65	87.44	88.72	85.19	88.71	81.51	88.71	89.08
BRP22	85.17	85.12	83.42	85.27	84.98	85.18	85.01	85.19	85.11	85.28	82.37	85.24	83.18	85.24	85.1	85.25	85.57	85.23	85.46	85.19	83.29	85.29	85.18	84.86	100	83.65	83.36	85.22	84.24	85.72	85	83.55	82.6	85.36	85.24	83.59	85.21	85.27	82.16	85.31	85.27	83.36	85.27	85.09	85.71	85.1	81.63	85.09	85.23
BRP14	84.09	83.11	86.79	84.13	83.92	83.53	83.71	83.99	83.55	83.12	85.42	83.11	85.89	84.06	83.74	84.13	82.73	83.84	84.04	83.67	86.33	84.2	82.89	82.42	83.59	100	86.56	84.11	86.16	83.27	83.49	86.13	86.12	84.25	84.45	86.81	84.05	84.18	85.5	84.02	83.53	87.02	83.78	84.06	83.53	82.84	82.42	83.88	83.66
NBAIM24	83.58	82.66	86.04	83.7	83.57	83.62	83.31	83.56	83.06	82.79	85.04	82.76	85.82	83.54	83.32	83.5	82.62	83.8	83.52	83.78	92.24	83.88	82.95	82.83	83.3	86.55	100	83.4	86.03	83.13	83.11	86.85	85.77	83.83	84.13	86.12	83.43	83.51	85.57	83.52	83.5	86.31	83.51	83.41	83.17	82.77	81.28	83.52	83.48
IC3195	98.2	97.82	83.9	84.75	97.79	88.55	89.03	98.13	88.88	97.73	82.55	97.72	83.31	98.17	89.09	98.18	85.08	97.53	98.2	88.57	83.13	98.14	90.19	88.74	85.22	84.23	83.36	100	84.09	85.43	88.78	83.49	82.83	87.55	87.53	84.26	98.24	84.64	82.78	98.18	90.04	83.89	87.56	97.78	85.4	95.87	81.46	96.67	90.07
Ensifer_terangae_USDA4894T	83.15	82.19	91.14	83.65	83.31	83.21	83.03	83.14	82.97	82.24	84.82	82.22	99.93	83.36	83.14	83.3	82.52	83.23	83.34	83.25	85.85	83.23	82.39	82.25	83.1	85.87	85.81	83.1	100	82.91	82.87	85.38	85.51	83.49	83.46	90.85	83.31	84.33	85.34	83.31	83.39	85.47	83.52	83.2	82.91	82.25	81.2	83.19	83.29
Bradyrhizobium_brasilense_UFLA_03-321_T	85.38	85.32	83.19	85.46	85.29	85.36	85.43	85.39	85.41	85.31	81.94	85.31	83.05	85.4	85.32	85.41	87.94	85.35	85.44	85.41	83.04	85.42	85.4	85.22	85.76	83.2	83.06	85.42	83.72	100	85.45	83.01	82.59	85.52	85.45	83.55	85.41	85.15	82.55	85.42	85.36	83.18	85.45	85.33	95.47	85.32	81.61	85.37	85.34
Bradyrhizobium_arachidis_CCBAU051107	88.76	88.69	83.58	84.73	88.64	89.54	89.14	88.75	89.34	88.68	82.76	88.68	83.04	88.78	89.14	88.76	85.23	88.68	88.75	89.56	83.05	88.76	88.88	88.8	85	83.42	83.02	88.77	83.88	85.45	100	83.31	82.53	87.86	87.89	83.38	88.79	84.55	82.8	88.8	88.91	83.53	87.85	88.69	85.41	88.65	81.68	88.68	88.9
Ensifer_sojae_CBBAU_05684T	83.37	82.6	85.61	83.43	83.31	84.2	83.62	83.47	83.49	82.68	84.66	82.67	85.39	83.44	84.63	83.5	82.51	83.4	83.4	84.89	86.71	83.59	82.72	82.8	83.47	86.16	86.87	83.45	85.56	83.02	83.33	100	85.37	83.97	84.31	85.69	83.3	84.16	85.06	83.47	83.94	90.08	83.58	83.34	83.22	82.75	81.47	83.46	83.92
Ensifer_meliloti_USDA_1002T	82.77	82.39	85.44	82.38	82.82	82.88	82.65	82.68	82.63	82.5	88.21	82.5	85.47	82.81	82.67	82.82	82.31	82.81	82.73	83.06	85.79	82.92	82.74	82.43	82.52	86.14	85.78	82.82	85.63	82.7	82.52	85.37	100	83.55	83.47	85.46	82.92	82.96	85.06	82.87	82.8	85.46	82.95	82.62	82.86	82.51	81.66	83.17	82.8
Bradyrhizobium_neotropicale_BR_1024T	87.48	87.48	84.07	84.86	87.48	87.92	87.71	87.5	88.22	87.49	82.48	87.49	83.59	87.49	87.78	87.48	85.21	87.5	87.47	87.95	83.46	87.49	87.69	87.45	85.12	83.8	83.51	87.49	84.35	85.41	87.82	83.67	82.96	100	91.25	83.78	87.48	84.63	82.74	87.47	87.76	83.78	97.95	87.48	85.4	87.44	81.41	87.5	87.76
Bradyrhizobium_centrolobii_strain_BR_10245_T	87.49	87.5	83.58	84.87	87.47	88.03	87.71	87.5	88.31	87.46	82.42	87.47	83.43	87.49	87.75	87.48	85.34	87.47	87.47	88.04	83.34	87.49	87.71	87.51	85.14	83.99	83.34	87.49	84.19	85.37	87.86	83.64	82.77	91.29	100	83.85	87.46	84.68	82.67	87.46	87.85	84.27	90.79	87.51	85.39	87.49	81.41	87.47	87.83
IC4062	84.03	83.25	92.22	84.02	84.11	83.73	83.79	84.14	83.63	83.2	84.8	83.19	90.86	84.12	83.47	84.27	82.58	84.18	84.11	83.97	85.94	84.36	82.87	82.5	83.66	86.83	86.13	84.23	90.88	83.65	83.4	85.69	85.47	84.13	84.54	100	83.98	84.5	85.62	83.95	84.19	86.01	83.91	84.12	83.7	82.79	81.7	84.04	84.25
NBAIM14	98.37	97.95	84.03	84.74	97.89	88.49	89.02	98.26	88.88	97.86	82.46	97.85	83.38	98.34	89.04	98.4	85.12	97.55	98.23	88.51	83.09	98.33	90.18	88.73	85.21	84.19	83.48	98.23	84.36	85.42	88.79	83.33	82.91	87.52	87.49	84.01	100	84.67	82.56	98.23	90.04	83.88	87.52	97.92	85.39	95.91	81.45	96.77	90.08
Bradyrhizobium_icens_LMTR_13T	84.68	84.57	84.25	88.61	84.59	84.57	84.57	84.63	84.66	84.59	82.57	84.59	84.6	84.65	84.64	84.67	85.06	84.62	84.64	84.62	83.33	84.66	84.6	84.44	85.32	84.19	83.5	84.62	85.39	85.15	84.55	84.16	82.96	84.78	84.8	84.59	84.67	100	82.59	84.63	84.72	83.84	84.7	84.62	85.23	84.68	80.83	84.57	84.65
IC3100	82.64	82.63	85.29	82.69	82.68	82.62	82.6	82.67	82.57	82.66	84.71	82.66	85.4	82.49	82.56	82.69	82.45	82.62	82.76	82.84	85.37	82.68	82.46	82.35	82.15	85.5	85.58	82.81	85.61	82.54	82.81	85.07	85.06	83.24	83.57	85.64	82.6	82.6	100	82.62	82.29	85	82.7	82.63	82.49	82.52	82.15	82.75	82.3
BRP20	98.21	97.82	83.83	84.77	97.86	88.55	89.03	98.11	88.87	97.72	82.46	97.72	83.33	98.16	89.12	98.14	85.14	97.5	98.34	88.58	83.2	98.08	90.2	88.73	85.33	83.95	83.49	98.19	84.31	85.43	88.8	83.49	82.86	87.54	87.49	84.01	98.26	84.65	82.54	100	90.06	84.08	87.54	97.79	85.41	95.83	81.62	96.64	90.09
Bradyrhizobium_liaoningense_CCBAU_05525	90.08	90.04	83.87	84.83	90.07	89.51	89.44	90.06	89.34	90.05	82.33	90.05	83.74	90.07	90.12	90.07	85.34	90.09	90.08	89.58	83.91	90.06	94.83	89.1	85.34	83.63	83.54	90.06	84.42	85.38	88.92	83.92	82.76	87.85	87.9	84.24	90.07	84.7	82.3	90.09	100	83.85	87.86	90.04	85.42	90.06	81.49	90.07	99.77
NBAIM29	83.85	82.88	85.98	83.45	83.89	83.76	83.58	83.85	83.17	82.99	84.67	83	85.51	83.86	83.79	83.96	82.47	83.9	83.9	83.95	85.76	84.01	82.85	82.61	83.27	87.02	86.31	83.79	85.91	83.17	83.5	90.09	85.44	84.21	84.78	86	83.83	83.84	85	83.96	83.85	100	83.66	83.94	83.54	83.03	81.18	83.84	83.88
Bradyrhizobium_neotropicale_Cp5-3_T	87.5	87.48	83.97	84.95	87.49	87.96	87.75	87.52	88.29	87.5	82.8	87.5	83.71	87.51	87.8	87.51	85.37	87.55	87.5	87.98	83.57	87.52	87.74	87.46	85.17	83.77	83.48	87.51	84.65	85.46	87.86	83.61	82.9	97.85	90.81	83.97	87.49	84.67	82.66	87.51	87.82	83.65	100	87.51	85.46	87.48	81.44	87.5	87.82
IC4061	97.91	99.28	83.82	84.73	98.11	88.45	88.97	97.82	88.74	98.01	82.51	98.01	83.45	97.86	89.01	97.84	85.1	97.91	97.78	88.47	83.05	97.93	90.09	88.74	85.08	84	83.42	97.79	84.27	85.34	88.69	83.43	82.68	87.52	87.53	84.14	97.93	84.62	82.54	97.8	90.04	84.06	87.5	100	85.33	95.81	81.68	97.18	90.05
Bradyrhizobium_pachyrhizi_PAC_48_T	85.37	85.33	83.71	85.51	85.26	85.35	85.3	85.39	85.39	85.33	81.9	85.32	83.17	85.36	85.29	85.4	87.91	85.32	85.44	85.37	82.95	85.37	85.38	85.2	85.72	83.44	83.15	85.41	84.01	95.49	85.42	83.26	82.76	85.49	85.53	83.67	85.4	85.23	82.5	85.41	85.4	83.51	85.46	85.33	100	85.32	81.87	85.31	85.41
Bradyrhizobium_yuanmingense_3051.fasta	95.94	96	82.48	84.66	95.83	88.47	88.89	95.92	88.77	95.96	82.45	95.95	82.57	95.91	88.96	95.86	85.14	95.87	95.87	88.49	82.52	95.92	90.17	88.74	85.13	82.99	82.73	95.88	83.44	85.35	88.66	82.79	82.56	87.51	87.52	82.8	95.92	84.67	82.54	95.83	90.05	83.08	87.49	95.81	85.3	100	81.88	95.72	90.06
Cupriavidus_taiwanensis_LMG_19424_T	81.7	81.94	81.42	81.28	81.51	81.26	81.41	81.3	82.03	81.7	83.08	81.7	81.44	81.45	81.35	81.76	81.52	81.58	81.75	81.26	80.82	81.72	81.58	81.51	81.76	82.14	81.15	81.5	81.44	81.65	81.68	81.2	81.52	81.35	81.64	81.47	81.46	80.87	82.34	81.76	81.7	80.74	81.24	81.65	82.03	81.86	100	81.77	81.73
NBAIM20	96.73	96.92	84.22	84.75	97.05	88.48	88.91	96.77	88.75	96.83	82.73	96.82	83.47	96.68	89.02	96.69	85.08	97.15	96.66	88.49	83.27	96.75	90.13	88.72	85.11	83.92	83.52	96.66	84.27	85.36	88.69	83.56	83.22	87.54	87.49	84.13	96.77	84.59	82.74	96.65	90.07	83.9	87.54	97.18	85.3	95.73	81.78	100	90.09
Bradyrhizobium_liaoningense_CCBAU_83689	90.08	90.03	83.81	84.81	90.08	89.44	89.45	90.07	89.34	90.04	82.37	90.04	83.59	90.08	89.99	90.08	85.22	90.11	90.08	89.46	83.84	90.06	94.86	89.09	85.27	83.75	83.45	90.06	84.31	85.37	88.92	83.91	82.76	87.81	87.88	84.16	90.08	84.68	82.31	90.09	99.75	83.88	87.85	90.05	85.43	90.05	81.51	90.08	100
Bradyrhizobium_ivorense_CI-1B_T	85.43	85.4	83.38	85.41	85.39	85.45	85.41	85.43	85.52	85.4	81.98	85.4	83.35	85.44	85.43	85.43	87.75	85.47	85.49	85.47	83.33	85.49	85.5	85.24	85.86	83.44	83.33	85.46	84.25	88.57	85.51	82.79	82.53	85.55	85.58	83.6	85.51	85.19	82.67	85.51	85.46	83.27	85.53	85.46	88.5	85.42	81.61	85.42	85.48
Ensifer_americanum_CFNEI_156_T	83.22	82.4	85.53	83.21	83.08	83.19	82.9	83	82.77	82.42	84.88	82.42	85.52	83.26	83.18	83.22	82.63	83.28	83.23	83.38	88.67	83.35	82.59	82.42	83.36	86.01	88.64	83.09	85.86	82.89	82.64	85.64	85.62	83.77	83.58	85.64	83.28	83.73	85.22	83.22	83.26	85.71	83.34	83.07	83.09	82.71	81.36	83.24	83.29
IC4060	97.91	99.27	83.86	84.73	98.11	88.43	88.95	97.8	88.74	98.01	82.55	98	83.46	97.85	89	97.83	85.11	97.89	97.78	88.46	83.04	97.92	90.1	88.73	85.07	83.92	83.39	97.79	84.27	85.33	88.68	83.38	82.62	87.52	87.52	84.12	97.92	84.61	82.52	97.79	90.04	84.07	87.5	99.88	85.32	95.81	81.72	97.17	90.04
Ensifer_aridi_LMR001_T	83.65	82.33	86.12	83.66	83.53	83.84	83.69	83.62	83.46	82.69	85.29	82.69	86.04	83.62	83.66	83.72	82.78	83.62	83.75	84.04	86.23	83.55	82.84	82.54	83.38	95.8	86.23	83.61	86.22	83.2	83.45	85.82	86.1	84.19	84.2	86.15	83.73	83.83	85.09	83.59	83.34	85.99	83.64	83.46	83.47	82.51	81.69	83.58	83.45
BRP05	99.91	97.97	83.92	84.74	97.82	88.47	89.01	98.38	88.87	98.33	82.47	98.33	83.36	98.44	89.02	98.45	85.17	97.63	98.2	88.49	83.21	98.44	90.16	88.72	85.2	84.14	83.57	98.19	84.28	85.39	88.77	83.48	82.78	87.51	87.58	84.19	98.38	84.7	82.61	98.19	90.09	83.95	87.5	97.89	85.38	95.92	81.8	96.73	90.08
NBAIM16	98.38	97.83	83.88	84.75	97.73	88.48	89	99.77	88.88	97.84	82.47	97.84	83.26	98.6	89.01	98.33	85.2	97.7	98.12	88.5	83.2	98.33	90.16	88.74	85.21	83.96	83.52	98.12	84.24	85.39	88.76	83.47	82.66	87.54	87.59	84.04	98.25	84.66	82.62	98.1	90.08	83.86	87.53	97.8	85.38	95.93	81.39	96.77	90.08
Ensifer_alkalisoli_YIC4027_T	83.27	82.96	85.39	82.51	83.19	83.13	83.06	83.23	82.69	83.1	84.63	83.1	85.28	83.27	83.04	83.38	82.45	83.2	83.29	83.34	85.7	83.43	82.9	82.82	82.56	85.69	85.8	83.26	85.55	82.49	82.94	89.95	85.29	83.21	83.85	85.35	83.24	82.85	84.98	83.26	82.95	98.88	82.83	83.22	82.62	83.2	81.47	83.14	82.95
NBAIM18	96.71	96.9	84.18	84.75	97.03	88.47	88.88	96.75	88.74	96.82	82.61	96.81	83.4	96.66	89	96.67	85.09	97.13	96.65	88.49	83.23	96.73	90.13	88.72	85.11	83.86	83.48	96.64	84.22	85.35	88.67	83.49	83.1	87.53	87.47	84.01	96.76	84.57	82.71	96.64	90.06	83.83	87.54	97.16	85.31	95.72	81.72	99.89	90.08
Bradyrhizobium_forestalis_INPA54B_T	90.69	90.63	83.34	84.76	90.58	89.03	89.84	90.71	90.47	90.58	82.4	90.58	83.05	90.73	89.59	90.69	85.2	90.58	90.67	89.04	83.34	90.69	90.92	89.23	85.12	83.79	83.38	90.69	83.81	85.42	89.39	83.37	82.6	87.96	88	83.53	90.69	84.71	82.4	90.67	91	83.47	87.95	90.59	85.38	90.58	81.48	90.59	91.01
Bradyrhizobium_pachyrhizi1040.fasta	85.39	85.36	83.4	85.47	85.35	85.37	85.4	85.41	85.46	85.4	82.1	85.39	83.17	85.4	85.35	85.47	88.02	85.49	85.51	85.39	82.89	85.48	85.46	85.25	85.79	83.31	83.18	85.47	83.95	95.56	85.47	83.11	82.73	85.61	85.59	83.42	85.46	85.23	82.42	85.49	85.46	83.15	85.63	85.37	98.04	85.3	81.72	85.45	85.47
IC3069	97.83	97.99	84.05	84.71	99.86	88.43	88.83	97.73	88.74	97.92	82.52	97.91	83.56	97.79	88.97	97.83	85.06	97.92	97.84	88.45	83.11	97.76	90.09	88.73	84.96	83.98	83.56	97.79	84.4	85.3	88.63	83.35	82.86	87.51	87.5	84.21	97.89	84.59	82.67	97.86	90.07	83.99	87.48	98.11	85.27	95.83	81.56	97.04	90.08
Bradyrhizobium_frederickii_CNPSo_3426_T	89.27	89.23	83.24	84.81	89.15	88.87	90.35	89.27	89.36	89.19	82.41	89.18	83.48	89.31	90.33	89.29	85.73	89.21	89.27	88.89	83.2	89.27	89.84	90.02	85.22	83.56	83.13	89.29	84.26	85.43	89.27	83.41	82.84	87.77	87.85	83.88	89.28	84.61	82.42	89.28	89.78	83.32	87.79	89.21	85.36	89.19	81.98	89.17	89.8
Bradyrhizobium_diazoefficiensUSDA110	88.85	88.83	83.4	84.87	88.8	90.9	89.3	88.87	89.57	88.82	82.51	88.81	83.2	88.87	90.73	88.93	85.28	88.87	88.95	91.06	84.03	88.95	89.13	89.11	85.22	83.56	83.35	88.95	84.08	85.43	89.41	84.32	82.95	88.28	88.4	83.46	88.9	84.73	82.62	88.94	90.16	83.64	88.23	88.82	85.42	88.83	81.67	88.85	89.82
BRP08	84.14	83.14	99.91	83.66	84.37	83.88	83.63	84.21	83.61	83.19	84.84	83.18	91.19	83.97	83.47	84.27	82.61	84.28	84.29	84.01	85.96	84.28	82.81	82.86	83.34	86.83	86.07	84.2	91.26	83.28	83.6	85.6	85.45	84.47	84.25	92.24	84.28	84.23	85.29	84.15	83.87	85.94	84.01	84.19	83.75	82.71	81.96	84.5	83.87
Bradyrhizobium_elkanii_USDA_76_T	85.5	85.51	83.38	85.5	85.39	86.35	85.47	85.52	85.57	85.66	82.01	85.66	83.29	85.52	86.65	85.72	88.02	85.82	85.74	86.57	83.41	85.77	85.62	85.29	85.89	83.54	83.3	85.71	84.06	94.97	85.73	83.95	82.45	85.61	85.68	83.63	85.63	85.27	82.49	85.76	87	83.43	85.64	85.49	94.53	85.4	81.63	85.59	86.17
Bradyrhizobium_tropiciagri_SEMIA_6148_T	85.38	85.26	83.53	85.39	85.28	85.34	85.31	85.39	85.44	85.26	82.24	85.25	83.34	85.37	85.3	85.4	87.86	85.37	85.42	85.35	83	85.38	85.33	85.15	85.73	83.45	83.04	85.4	84.23	90.9	85.4	83.29	82.35	85.41	85.52	83.35	85.38	85.13	82.51	85.44	85.33	83.37	85.35	85.3	90.6	85.31	81.55	85.28	85.32
BRP56	85.46	85.44	83.66	85.54	85.38	86.16	85.39	85.48	85.52	85.51	82.06	85.48	83.06	85.47	86.59	85.72	87.97	85.74	85.73	86.25	83.41	85.83	85.56	85.24	85.89	83.45	83.03	85.72	83.93	96.52	85.54	83.76	82.66	85.62	85.56	83.83	85.59	85.18	82.54	85.74	85.82	83.24	85.59	85.41	95.39	85.38	81.81	85.61	85.66
NBAIM17	97.9	97.87	83.19	84.72	97.8	88.44	88.87	97.79	88.76	97.79	82.54	97.78	82.75	97.86	89	97.88	85.07	97.52	97.75	88.46	82.5	97.81	90.17	88.73	85.2	82.97	82.82	97.74	83.79	85.32	88.66	82.5	82.6	87.5	87.48	83.16	98.63	84.58	82.64	97.74	90.03	83.06	87.46	97.87	85.35	95.94	81.49	96.71	90.05
NBAIM01	97.85	97.92	82.75	84.68	97.82	88.39	88.87	98.2	88.74	97.85	82.47	97.85	82.61	98.16	88.95	97.83	85.02	97.7	97.77	88.41	82.5	97.88	90.09	88.74	84.98	83.02	82.67	97.79	83.65	85.3	88.66	82.57	82.54	87.48	87.49	82.9	97.94	84.53	82.54	97.77	90.01	83.01	87.47	97.85	85.29	95.9	81.48	96.77	90.02
Bradyrhizobium_sp_C9	85.26	85.25	83.34	85.39	85.23	85.26	85.27	85.32	85.35	85.23	82.47	85.22	83.31	85.3	85.22	85.33	87.73	85.31	85.33	85.29	83.17	85.34	85.2	85.17	85.61	83.28	83.14	85.33	84.23	90.72	85.31	83.07	82.47	85.29	85.3	83.38	85.31	85.18	82.54	85.34	85.25	83.22	85.29	85.24	90.56	85.16	81.9	85.27	85.25
Bradyrhizobium_zhanjiangense_CCBAU_51778	89.31	89.01	83.81	84.8	88.95	89.02	89.34	89.32	90.02	88.97	82.65	88.97	83.55	89.3	89.35	89.35	85.15	89.01	89.38	89.04	83.41	89.37	89.47	88.89	85.3	83.53	83.26	89.39	84.27	85.37	89.16	83.18	82.84	88	88.14	83.95	89.35	84.71	82.52	89.38	89.56	83.75	88	89.01	85.34	88.92	81.73	89	89.57
NBAIM03	98.31	97.92	83.86	84.76	97.83	88.56	89.05	98.25	88.91	97.82	82.55	97.82	83.32	98.32	89.1	98.28	85.15	97.55	98.06	88.58	83.01	98.24	90.15	88.74	85.22	84.03	83.74	98.12	84.25	85.49	88.78	83.5	82.9	87.56	87.55	84.17	99.18	84.7	82.73	98.08	90.06	83.96	87.56	97.88	85.42	95.9	82.18	96.76	90.08
[truncated: 22 more columns]
