# Supplementary material for: Genomic Diversity of Pigeon Pea (Cajanus cajan L. Millsp.) Endosymbionts in India and Selection of Potential Strains for Use as Agricultural Inoculants
Source: Front Plant Sci. 2021 Sep 7;12:680981. doi: 10.3389/fpls.2021.680981 (PMC8453007; doi:10.3389/fpls.2021.680981)
Supplement: Supplementary file 12 [file Table_8.xlsx]

## Sheet: Supplementary Table S8
Supplementary Table S8. Pairwise nodC distance matrix.
Strain	Bradyrhizobium_ottawaense_OO99T_Glycine_max	Bradyrhizobium_japonicum_USDA_6T_Glycine_max	Bradyrhizobium_lupini_DSM_30140T_Lupinus_albus	Bradyrhizobium_liaoningense_CCBAU_05525_Glycine_max	Bradyrhizobium_diazoefficiens_USDA_110T_Glycine_max	Bradyrhizobium_yuanmingense_CCBAU_10071T_Lespedaza_cuneata	Bradyrhizobium_yuanmingense_CGMCC_1.3531_Lespedeza_cuneata	Bradyrhizobium_yuanmingense_CCBAU_05623_Glycine_max	Bradyrhizobium_yuanmingense_CCBAU_35157_Glycine_max	Bradyrhizobium_sp._LCT2_Lespedeza_cuneata	Bradyrhizobium_arachidis_CCBAU_51107T_Arachis_hypogeae	Bradyrhizobium_cajani_AMBPC1010T_Cajanus_cajan	Bradyrhizobium_vignae_ORS3257T_Vigna_unguiculata	Bradyrhizobium_zhanjiangense_CCBAU_51778T_Arachis_hypogeae	Bradyrhizobium_pachyrrhizi_PAC48T_Pachyrhizus_erosus	Bradyrhizobium_ivorense_CI-1BT_Cajanus_cajan	Bradyrhizobium_elkanii_USDA_61_Glycine_max	Bradyrhizobium_elkanii_USDA_76T_Glycine_max	Bradyrhizobium_brasilense_UFLA03-321T_Vigna_unguiculata	Bradyrhizobium_tropiciagri_SEMIA_6148T_Neonotonia_wightii	Bradyrhizobium_pachyrhizi_1040_Cajanus_cajan	Bradyrhizobium_yuanmingense_3051_Cajanus_cajan	Bradyrhizobium_icense_LMTR_13T_Phaseolus_lunatus	Bradyrhizobium_paxllaeri_LMTR_21T_Phaseolus_lunatus	Ensifer_aridi_LMR001T_Phaseolus_filiformis	Ensifer_terangae_USDA_4894T_Senegalia_laeta	Ensifer_fredii_NGR234_lablab_purpureus	Ensifer_fredii_HH103_Glycyrrhiza_uralensis	Ensifer_sojae_CCBAU_05684_Glycine_max	Ensifer_fredii_NBRC_14780_t_Glycine_max	Ensifer_medicae_WSM419_Medicago_spp	Ensifer_meliloti_USDA1022T_Medicago_sativa	Ensifer_medicae_USDA_1037T_Medicago_truncatula	Ensifer_meliloti_1021_Medicaio_sativa	Cupriavidus_taiwanensis_LMG_19424T_Mimosa_sp	Ensifer_sp_IC3342_Macroptilium_atropurpureum	Ensifer_sp_IC4062_unknown	Bradyrhizobium_yuanmingense_IC3069_Indigofera_glandulosa	Bradyrhizobium_yuanmingense_IC4059_Pongamia_pinnata	Bradyrhizobium_yuanmingense_IC4060_Pongamia_pinnata	Bradyrhizobium_yuanmingense_IC4061_Pongamia_pinnata	Bradyrhizobium_yuanmingense_IC3123_Arachis_hypogeae	Bradyrhizobium_yuanmingense_IC3195_Macroptilium_atropurpureum	Ensifer_sp_BRP08_Cajanus_cajan	Ensifer_aridi_BRP14_Cajanus_cajan	Ensifer_alakalisoli_NBAIM29_Cajanus_cajan	Ensifer_alkalisoli_YIC4027T_Sesbania_cannabina	Bradyrhizobium_yuanmingense_NBAIM01_Cajanus_cajan	Bradyrhizobium_sp_BRP22_Cajanus_cajan
Bradyrhizobium_ottawaense_OO99T_Glycine_max
Bradyrhizobium_japonicum_USDA_6T_Glycine_max	0
Bradyrhizobium_lupini_DSM_30140T_Lupinus_albus	0	0
Bradyrhizobium_liaoningense_CCBAU_05525_Glycine_max	0	0	0
Bradyrhizobium_diazoefficiens_USDA_110T_Glycine_max	0	0	0	0
Bradyrhizobium_yuanmingense_CCBAU_10071T_Lespedaza_cuneata	0.0991678	0.0991678	0.0991678	0.0991678	0.0991678
Bradyrhizobium_yuanmingense_CGMCC_1.3531_Lespedeza_cuneata	0.0991678	0.0991678	0.0991678	0.0991678	0.0991678	0
Bradyrhizobium_yuanmingense_CCBAU_05623_Glycine_max	0.110767	0.110767	0.110767	0.110767	0.110767	0.0461113	0.0461113
Bradyrhizobium_yuanmingense_CCBAU_35157_Glycine_max	0.109944	0.109944	0.109944	0.109944	0.109944	0.0453239	0.0453239	0.000691563
Bradyrhizobium_sp._LCT2_Lespedeza_cuneata	0.14255	0.14255	0.14255	0.14255	0.14255	0.144074	0.144074	0.163314	0.162363
Bradyrhizobium_arachidis_CCBAU_51107T_Arachis_hypogeae	0.163095	0.163095	0.163095	0.163095	0.163095	0.179848	0.179848	0.198659	0.19765	0.0839756
Bradyrhizobium_cajani_AMBPC1010T_Cajanus_cajan	0.156284	0.156284	0.156284	0.156284	0.156284	0.171302	0.171302	0.184993	0.184008	0.0856367	0.0458503
Bradyrhizobium_vignae_ORS3257T_Vigna_unguiculata	0.160473	0.160473	0.160473	0.160473	0.160473	0.167258	0.167258	0.184454	0.183476	0.0946863	0.0734465	0.0751852
Bradyrhizobium_zhanjiangense_CCBAU_51778T_Arachis_hypogeae	0.150687	0.150687	0.150687	0.150687	0.150687	0.161167	0.161167	0.174261	0.173297	0.0790047	0.0725691	0.0742406	0.0766507
Bradyrhizobium_pachyrrhizi_PAC48T_Pachyrhizus_erosus	0.225698	0.225698	0.225698	0.225698	0.225698	0.232701	0.232701	0.2445	0.245573	0.179579	0.194121	0.198066	0.205045	0.19124
Bradyrhizobium_ivorense_CI-1BT_Cajanus_cajan	0.225071	0.225071	0.225071	0.225071	0.225071	0.233142	0.233142	0.246416	0.245319	0.173218	0.194031	0.192031	0.193096	0.177437	0.101224
Bradyrhizobium_elkanii_USDA_61_Glycine_max	0.229458	0.229458	0.229458	0.229458	0.229458	0.234613	0.234613	0.245491	0.246572	0.185546	0.213456	0.205358	0.21229	0.194491	0.108701	0.0890809
Bradyrhizobium_elkanii_USDA_76T_Glycine_max	0.229458	0.229458	0.229458	0.229458	0.229458	0.234613	0.234613	0.245491	0.246572	0.185546	0.213456	0.205358	0.21229	0.194491	0.108701	0.0890809	0
Bradyrhizobium_brasilense_UFLA03-321T_Vigna_unguiculata	0.276065	0.276065	0.276065	0.276065	0.276065	0.277061	0.277061	0.286473	0.285329	0.214712	0.249746	0.25807	0.246695	0.244461	0.248235	0.250098	0.253622	0.253622
Bradyrhizobium_tropiciagri_SEMIA_6148T_Neonotonia_wightii	0.27413	0.27413	0.27413	0.27413	0.27413	0.270552	0.270552	0.278712	0.27759	0.209798	0.241451	0.244472	0.235291	0.237312	0.242273	0.24676	0.251809	0.251809	0.0506933
Bradyrhizobium_pachyrhizi_1040_Cajanus_cajan	0.277541	0.277541	0.277541	0.277541	0.277541	0.277399	0.277399	0.283466	0.282318	0.217334	0.252065	0.260511	0.246701	0.246525	0.246189	0.250476	0.25692	0.25692	0.0577725	0.0339932
Bradyrhizobium_yuanmingense_3051_Cajanus_cajan	0.376178	0.376178	0.376178	0.376178	0.376178	0.383419	0.383419	0.376534	0.377869	0.327713	0.33604	0.34414	0.339926	0.343158	0.354633	0.337158	0.35246	0.35246	0.378699	0.36554	0.370382
Bradyrhizobium_icense_LMTR_13T_Phaseolus_lunatus	0.33367	0.33367	0.33367	0.33367	0.33367	0.356573	0.356573	0.366898	0.368248	0.287745	0.303177	0.299097	0.323348	0.311168	0.309335	0.301294	0.308835	0.308835	0.358703	0.344229	0.360827	0.290217
Bradyrhizobium_paxllaeri_LMTR_21T_Phaseolus_lunatus	0.344738	0.344738	0.344738	0.344738	0.344738	0.363219	0.363219	0.370941	0.37229	0.307558	0.319456	0.317773	0.33392	0.314806	0.317888	0.307642	0.317963	0.317963	0.377199	0.367539	0.383381	0.309087	0.0670343
Ensifer_aridi_LMR001T_Phaseolus_filiformis	0.404516	0.404516	0.404516	0.404516	0.404516	0.419203	0.419203	0.421802	0.423243	0.37872	0.381781	0.375938	0.372549	0.377273	0.36683	0.359307	0.362939	0.362939	0.433535	0.420453	0.428911	0.38569	0.277888	0.277491
Ensifer_terangae_USDA_4894T_Senegalia_laeta	0.414044	0.414044	0.414044	0.414044	0.414044	0.421523	0.421523	0.438334	0.436837	0.381178	0.396514	0.385194	0.396053	0.38282	0.388249	0.382273	0.371884	0.371884	0.444051	0.429642	0.428996	0.418263	0.311409	0.32538	0.15422
Ensifer_fredii_NGR234_lablab_purpureus	0.389816	0.389816	0.389816	0.389816	0.389816	0.412205	0.412205	0.411602	0.411602	0.377544	0.368259	0.373103	0.375484	0.389353	0.342379	0.36497	0.365617	0.365617	0.409033	0.409248	0.41128	0.342242	0.306827	0.325236	0.317381	0.327837
Ensifer_fredii_HH103_Glycyrrhiza_uralensis	0.388348	0.388348	0.388348	0.388348	0.388348	0.40759	0.40759	0.407008	0.407008	0.371661	0.365397	0.371652	0.372556	0.387853	0.342379	0.366399	0.365617	0.365617	0.40441	0.404619	0.409734	0.346363	0.304467	0.322834	0.318712	0.327837	0.00484654
Ensifer_sojae_CCBAU_05684_Glycine_max	0.387038	0.387038	0.387038	0.387038	0.387038	0.406061	0.406061	0.405675	0.405675	0.371853	0.365559	0.371828	0.372743	0.388054	0.341287	0.365289	0.364516	0.364516	0.403294	0.403505	0.407067	0.343891	0.303436	0.321786	0.317656	0.326777	0.00485439	0
Ensifer_fredii_NBRC_14780_t_Glycine_max	0.387038	0.387038	0.387038	0.387038	0.387038	0.406061	0.406061	0.405675	0.405675	0.371853	0.365559	0.371828	0.372743	0.388054	0.341287	0.365289	0.364516	0.364516	0.403294	0.403505	0.407067	0.343891	0.303436	0.321786	0.317656	0.326777	0.00485439	0	0
Ensifer_medicae_WSM419_Medicago_spp	0.445798	0.445798	0.445798	0.445798	0.445798	0.431357	0.431357	0.429674	0.429674	0.420201	0.413251	0.425992	0.431302	0.42472	0.392399	0.383796	0.388357	0.388357	0.425884	0.433918	0.42358	0.394873	0.332305	0.347765	0.350544	0.370729	0.341054	0.342813	0.341943	0.341943
Ensifer_meliloti_USDA1022T_Medicago_sativa	0.440518	0.440518	0.440518	0.440518	0.440518	0.429289	0.429289	0.424557	0.424557	0.421247	0.415388	0.428124	0.43023	0.424227	0.393097	0.390706	0.398713	0.398713	0.431661	0.436604	0.426247	0.386037	0.323443	0.336388	0.355734	0.373881	0.337278	0.338985	0.338112	0.338112	0.031191
Ensifer_medicae_USDA_1037T_Medicago_truncatula	0.44531	0.44531	0.44531	0.44531	0.44531	0.435368	0.435368	0.427658	0.427658	0.424143	0.409946	0.425476	0.433425	0.424227	0.392399	0.386703	0.394046	0.394046	0.426328	0.431009	0.417835	0.395081	0.338605	0.353165	0.353134	0.371128	0.332884	0.334609	0.33478	0.33478	0.00554428	0.0356643
Ensifer_meliloti_1021_Medicaio_sativa	0.440518	0.440518	0.440518	0.440518	0.440518	0.429289	0.429289	0.424557	0.424557	0.421247	0.415388	0.428124	0.43023	0.424227	0.393097	0.390706	0.398713	0.398713	0.431661	0.436604	0.426247	0.386037	0.323443	0.336388	0.355734	0.373881	0.337278	0.338985	0.338112	0.338112	0.031191	0	0.0356643
Cupriavidus_taiwanensis_LMG_19424T_Mimosa_sp	0.512823	0.512823	0.512823	0.512823	0.512823	0.529407	0.529407	0.534699	0.532929	0.492823	0.504855	0.501766	0.505417	0.491402	0.505735	0.508107	0.516296	0.516296	0.515243	0.503655	0.504591	0.510414	0.446603	0.4331	0.485964	0.515541	0.480763	0.477789	0.478021	0.478021	0.487298	0.49489	0.488527	0.49489
Ensifer_sp_IC3342_Macroptilium_atropurpureum	0.372419	0.372419	0.372419	0.372419	0.372419	0.393818	0.393818	0.399351	0.399351	0.379694	0.373187	0.376644	0.377022	0.385507	0.341183	0.35991	0.355959	0.355959	0.397562	0.394568	0.398687	0.336222	0.305734	0.322541	0.303696	0.315163	0.0818279	0.0818279	0.0818279	0.0818279	0.345814	0.337457	0.33585	0.337457	0.498246
Ensifer_sp_IC4062_unknown	0.369367	0.369367	0.369367	0.369367	0.369367	0.388147	0.388147	0.395501	0.393993	0.373923	0.368716	0.366361	0.373808	0.378417	0.338206	0.35689	0.3553	0.3553	0.388884	0.384446	0.388434	0.335072	0.305302	0.324702	0.311744	0.314981	0.0828553	0.0828553	0.0828553	0.0828553	0.342368	0.333999	0.336562	0.333999	0.491867	0.00732509
Bradyrhizobium_yuanmingense_IC3069_Indigofera_glandulosa	0.103221	0.103221	0.103221	0.103221	0.103221	0.0383383	0.0383383	0.0148004	0.0155517	0.155985	0.188954	0.177433	0.174023	0.166825	0.239493	0.235897	0.243697	0.243697	0.283246	0.275528	0.280218	0.37255	0.354249	0.358282	0.41786	0.432373	0.405867	0.401314	0.399991	0.399991	0.422354	0.417309	0.421692	0.417309	0.521257	0.39371	0.39099
Bradyrhizobium_yuanmingense_IC4059_Pongamia_pinnata	0.103221	0.103221	0.103221	0.103221	0.103221	0.0383383	0.0383383	0.0148004	0.0155517	0.155985	0.188954	0.177433	0.174023	0.166825	0.239493	0.235897	0.243697	0.243697	0.283246	0.275528	0.280218	0.37255	0.354249	0.358282	0.41786	0.432373	0.405867	0.401314	0.399991	0.399991	0.422354	0.417309	0.421692	0.417309	0.521257	0.39371	0.39099	0
Bradyrhizobium_yuanmingense_IC4060_Pongamia_pinnata	0.110028	0.110028	0.110028	0.110028	0.110028	0.0461113	0.0461113	0.00146413	0.00219781	0.163314	0.198659	0.186969	0.184454	0.174261	0.243429	0.245319	0.246572	0.246572	0.288769	0.280964	0.28577	0.375203	0.365553	0.369595	0.418933	0.436837	0.410066	0.405486	0.404155	0.404155	0.428112	0.423014	0.426105	0.423014	0.532929	0.397845	0.393993	0.0148004	0.0148004
Bradyrhizobium_yuanmingense_IC4061_Pongamia_pinnata	0.110028	0.110028	0.110028	0.110028	0.110028	0.0461113	0.0461113	0.00146413	0.00219781	0.163314	0.198659	0.186969	0.184454	0.174261	0.243429	0.245319	0.246572	0.246572	0.288769	0.280964	0.28577	0.375203	0.365553	0.369595	0.418933	0.436837	0.410066	0.405486	0.404155	0.404155	0.428112	0.423014	0.426105	0.423014	0.532929	0.397845	0.393993	0.0148004	0.0148004	0
Bradyrhizobium_yuanmingense_IC3123_Arachis_hypogeae	0.146941	0.146941	0.146941	0.146941	0.146941	0.162994	0.162994	0.17723	0.176259	0.0805888	0.0708962	0.0734031	0.0741777	0.0289225	0.192278	0.182262	0.201358	0.201358	0.250645	0.239339	0.249521	0.333813	0.314576	0.319811	0.369749	0.383918	0.379228	0.377744	0.377947	0.377947	0.42864	0.429709	0.428124	0.429709	0.498113	0.372124	0.365138	0.169758	0.169758	0.17723	0.17723
Bradyrhizobium_yuanmingense_IC3195_Macroptilium_atropurpureum	0.148835	0.148835	0.148835	0.148835	0.148835	0.16211	0.16211	0.176325	0.175355	0.08143	0.0717215	0.0742406	0.075014	0.0289322	0.193322	0.184286	0.19844	0.19844	0.249655	0.238363	0.248521	0.339926	0.315819	0.322289	0.373576	0.38336	0.380716	0.379228	0.379433	0.379433	0.420766	0.421834	0.423399	0.421834	0.500695	0.379083	0.372045	0.168861	0.168861	0.176325	0.176325	0.00730296
Ensifer_sp_BRP08_Cajanus_cajan	0.36794	0.36794	0.36794	0.36794	0.36794	0.386659	0.386659	0.393993	0.392489	0.375402	0.370161	0.367804	0.375274	0.379899	0.336847	0.355476	0.353897	0.353897	0.390372	0.385921	0.389929	0.333717	0.303988	0.32335	0.310426	0.313662	0.0837916	0.0837916	0.0837916	0.0837916	0.340963	0.332618	0.335163	0.332618	0.490134	0.00650676	0.000803859	0.389495	0.389495	0.392489	0.392489	0.366591	0.373515
Ensifer_aridi_BRP14_Cajanus_cajan	0.399619	0.399619	0.399619	0.399619	0.399619	0.441992	0.441992	0.443762	0.445259	0.397861	0.387442	0.391227	0.398341	0.400782	0.367808	0.392637	0.385375	0.385375	0.431652	0.430192	0.436395	0.360638	0.339791	0.351869	0.330787	0.359326	0.0380143	0.0380143	0.0380772	0.0380772	0.338992	0.336722	0.332066	0.336722	0.509499	0.0752707	0.0745317	0.435241	0.435241	0.440781	0.440781	0.393849	0.396646	0.0754466
Ensifer_alakalisoli_NBAIM29_Cajanus_cajan	0.404708	0.404708	0.404708	0.404708	0.404708	0.44179	0.44179	0.442078	0.443568	0.397674	0.385588	0.39106	0.393649	0.401651	0.364023	0.391421	0.381458	0.381458	0.432927	0.435864	0.445076	0.367029	0.33767	0.345828	0.323411	0.351919	0.0304099	0.0295689	0.0296175	0.0296175	0.335731	0.333435	0.328809	0.333435	0.502498	0.0744284	0.0736925	0.433587	0.433587	0.439111	0.439111	0.394695	0.397488	0.0746083	0.0173414
Ensifer_alkalisoli_YIC4027T_Sesbania_cannabina	0.397108	0.397108	0.397108	0.397108	0.397108	0.413598	0.413598	0.418136	0.418136	0.384789	0.394307	0.381935	0.389574	0.381605	0.376604	0.371632	0.379867	0.379867	0.411482	0.402006	0.416673	0.398317	0.37364	0.373198	0.375486	0.382651	0.356467	0.360093	0.360782	0.360782	0.383982	0.386024	0.390385	0.386024	0.459938	0.357791	0.359245	0.419904	0.419904	0.419699	0.419699	0.380517	0.377751	0.357791	0.3595	0.362898
Bradyrhizobium_yuanmingense_NBAIM01_Cajanus_cajan	0.163605	0.163605	0.163605	0.163605	0.163605	0.159226	0.159226	0.180297	0.179305	0.087697	0.121312	0.123205	0.130128	0.105712	0.186159	0.185745	0.199228	0.199228	0.246271	0.235018	0.243582	0.345734	0.322101	0.336165	0.399714	0.390942	0.3925	0.387941	0.386636	0.386636	0.404596	0.403677	0.405894	0.403677	0.515954	0.367008	0.362532	0.172642	0.172642	0.180297	0.180297	0.110054	0.107438	0.363996	0.401566	0.411496	0.370367
Bradyrhizobium_sp_BRP22_Cajanus_cajan	0.353422	0.353422	0.353422	0.353422	0.353422	0.360568	0.360568	0.373485	0.372145	0.303952	0.316654	0.317467	0.333601	0.326173	0.344023	0.340021	0.337613	0.337613	0.376188	0.372324	0.3788	0.316504	0.168093	0.181173	0.311761	0.342755	0.341577	0.337427	0.336343	0.336343	0.351304	0.344454	0.352855	0.344454	0.485774	0.327877	0.32869	0.363444	0.363444	0.372145	0.372145	0.33329	0.332022	0.327335	0.363702	0.358548	0.403764	0.33671
Bradyrhizobium_yuanmingense_BRP09_Cajanus_cajan	0.104948	0.104948	0.104948	0.104948	0.104948	0.0398971	0.0398971	0.0163042	0.0170577	0.15787	0.190946	0.179386	0.17595	0.168737	0.240559	0.23806	0.244779	0.244779	0.283246	0.275528	0.280218	0.37255	0.354249	0.360927	0.41786	0.432373	0.405867	0.401314	0.399991	0.399991	0.422354	0.417309	0.418624	0.417309	0.524729	0.390729	0.388005	0.00146413	0.00146413	0.0163042	0.0163042	0.171683	0.170784	0.386519	0.435241	0.433587	0.423049	0.174609	0.362125
Bradyrhizobium_yuanmingense_NBAIM18_Cajanus_cajan	0.104053	0.104053	0.104053	0.104053	0.104053	0.0391037	0.0391037	0.0140435	0.0147931	0.156867	0.189872	0.178339	0.174928	0.167721	0.242612	0.239054	0.246852	0.246852	0.282207	0.2745	0.279171	0.373728	0.352768	0.359438	0.419111	0.436621	0.410262	0.405675	0.404345	0.404345	0.423677	0.418624	0.423014	0.418624	0.522713	0.395025	0.392301	0.0021966	0.0021966	0.0140435	0.0140435	0.170656	0.169758	0.390804	0.439487	0.437818	0.421266	0.173565	0.364616
Bradyrhizobium_yuanmingense_NBAIM20_Cajanus_cajan	0.104053	0.104053	0.104053	0.104053	0.104053	0.0391037	0.0391037	0.0140435	0.0147931	0.156867	0.189872	0.178339	0.174928	0.167721	0.242612	0.239054	0.246852	0.246852	0.282207	0.2745	0.279171	0.373728	0.352768	0.359438	0.419111	0.436621	0.410262	0.405675	0.404345	0.404345	0.423677	0.418624	0.423014	0.418624	0.522713	0.395025	0.392301	0.0021966	0.0021966	0.0140435	0.0140435	0.170656	0.169758	0.390804	0.439487	0.437818	0.421266	0.173565	0.364616
Bradyrhizobium_brasilense_BRP56_Cajanus_cajan	0.226346	0.226346	0.226346	0.226346	0.226346	0.231452	0.231452	0.244412	0.245491	0.182622	0.210404	0.204355	0.20925	0.192528	0.105232	0.0865168	0.00291972	0.00291972	0.254701	0.250739	0.258015	0.348672	0.305168	0.314282	0.359038	0.373211	0.365617	0.365617	0.364516	0.364516	0.383984	0.394248	0.389627	0.394248	0.514583	0.354556	0.353897	0.240468	0.240468	0.243336	0.243336	0.198379	0.195475	0.352499	0.385375	0.381458	0.379867	0.19617	0.335062
Bradyrhizobium_yuanmingense_BRP05_Cajanus_cajan	0.146941	0.146941	0.146941	0.146941	0.146941	0.162994	0.162994	0.17723	0.176259	0.0805888	0.0708962	0.0734031	0.0741777	0.0289225	0.192278	0.182262	0.201358	0.201358	0.250645	0.239339	0.249521	0.333813	0.314576	0.319811	0.369749	0.383918	0.379228	0.377744	0.377947	0.377947	0.42864	0.429709	0.428124	0.429709	0.498113	0.372124	0.365138	0.169758	0.169758	0.17723	0.17723	0	0.00730296	0.366591	0.393849	0.394695	0.380517	0.110054	0.33329
Bradyrhizobium_yuanmingense_BRP19_Cajanus_cajan	0.148888	0.148888	0.148888	0.148888	0.148888	0.160286	0.160286	0.174452	0.173484	0.0798057	0.0709282	0.0726309	0.0734031	0.0296841	0.190441	0.182379	0.199495	0.199495	0.247591	0.236339	0.246439	0.340063	0.315977	0.322436	0.371071	0.384916	0.377744	0.376265	0.376466	0.376466	0.422331	0.423399	0.421834	0.423399	0.498698	0.373588	0.366591	0.167007	0.167007	0.174452	0.174452	0.00803571	0.00656821	0.368049	0.394034	0.394876	0.37795	0.108322	0.33091
Bradyrhizobium_yuanmingense_BRP20_Cajanus_cajan	0.148888	0.148888	0.148888	0.148888	0.148888	0.160286	0.160286	0.174452	0.173484	0.0798057	0.0709282	0.0726309	0.0734031	0.0296841	0.190441	0.182379	0.199495	0.199495	0.247591	0.236339	0.246439	0.340063	0.315977	0.322436	0.371071	0.384916	0.377744	0.376265	0.376466	0.376466	0.422331	0.423399	0.421834	0.423399	0.498698	0.373588	0.366591	0.167007	0.167007	0.174452	0.174452	0.00803571	0.00656821	0.368049	0.394034	0.394876	0.37795	0.108322	0.33091
Bradyrhizobium_yuanmingense_BRP23_Cajanus_cajan	0.146941	0.146941	0.146941	0.146941	0.146941	0.162994	0.162994	0.17723	0.176259	0.0805888	0.0708962	0.0734031	0.0741777	0.0289225	0.192278	0.182262	0.201358	0.201358	0.250645	0.239339	0.249521	0.333813	0.314576	0.319811	0.369749	0.383918	0.379228	0.377744	0.377947	0.377947	0.42864	0.429709	0.428124	0.429709	0.498113	0.372124	0.365138	0.169758	0.169758	0.17723	0.17723	0	0.00730296	0.366591	0.393849	0.394695	0.380517	0.110054	0.33329
Bradyrhizobium_yuanmingense_NBAIM02_Cajanus_cajan	0.146941	0.146941	0.146941	0.146941	0.146941	0.162994	0.162994	0.17723	0.176259	0.0805888	0.0708962	0.0734031	0.0741777	0.0289225	0.192278	0.182262	0.201358	0.201358	0.250645	0.239339	0.249521	0.333813	0.314576	0.319811	0.369749	0.383918	0.379228	0.377744	0.377947	0.377947	0.42864	0.429709	0.428124	0.429709	0.498113	0.372124	0.365138	0.169758	0.169758	0.17723	0.17723	0	0.00730296	0.366591	0.393849	0.394695	0.380517	0.110054	0.33329
Bradyrhizobium_yuanmingense_NBAIM03_Cajanus_cajan	0.147041	0.147041	0.147041	0.147041	0.147041	0.160286	0.160286	0.174452	0.173484	0.0773487	0.068505	0.0701918	0.070964	0.0266446	0.19326	0.182262	0.196522	0.196522	0.249566	0.238286	0.248435	0.336304	0.312251	0.318719	0.371071	0.382176	0.377544	0.376066	0.376265	0.376265	0.422583	0.423649	0.425221	0.423649	0.500396	0.373393	0.366397	0.167007	0.167007	0.174452	0.174452	0.0065662	0.00510193	0.367853	0.393665	0.394516	0.381804	0.107399	0.332176
Bradyrhizobium_yuanmingense_NBAIM08_Cajanus_cajan	0.146941	0.146941	0.146941	0.146941	0.146941	0.162994	0.162994	0.17723	0.176259	0.0805888	0.0708962	0.0734031	0.0741777	0.0289225	0.192278	0.182262	0.201358	0.201358	0.250645	0.239339	0.249521	0.333813	0.314576	0.319811	0.369749	0.383918	0.379228	0.377744	0.377947	0.377947	0.42864	0.429709	0.428124	0.429709	0.498113	0.372124	0.365138	0.169758	0.169758	0.17723	0.17723	0	0.00730296	0.366591	0.393849	0.394695	0.380517	0.110054	0.33329
Bradyrhizobium_yuanmingense_NBAIM14_Cajanus_cajan	0.153422	0.153422	0.153422	0.153422	0.153422	0.163939	0.163939	0.178203	0.17723	0.0830579	0.0749547	0.0766737	0.0766286	0.0319759	0.192278	0.183243	0.203354	0.203354	0.251726	0.239339	0.248435	0.33979	0.319408	0.32588	0.377426	0.390056	0.379025	0.377544	0.377744	0.377744	0.425732	0.423649	0.425221	0.423649	0.501503	0.37486	0.367853	0.17072	0.17072	0.178203	0.178203	0.0102481	0.00877572	0.369313	0.393665	0.394516	0.379637	0.111832	0.334406
Bradyrhizobium_yuanmingense_NBAIM16_Cajanus_cajan	0.146941	0.146941	0.146941	0.146941	0.146941	0.162994	0.162994	0.17723	0.176259	0.0805888	0.0708962	0.0734031	0.0741777	0.0289225	0.192278	0.182262	0.201358	0.201358	0.250645	0.239339	0.249521	0.333813	0.314576	0.319811	0.369749	0.383918	0.379228	0.377744	0.377947	0.377947	0.42864	0.429709	0.428124	0.429709	0.498113	0.372124	0.365138	0.169758	0.169758	0.17723	0.17723	0	0.00730296	0.366591	0.393849	0.394695	0.380517	0.110054	0.33329
Bradyrhizobium_yuanmingense_NBAIM32_Cajanus_cajan	0.0991678	0.0991678	0.0991678	0.0991678	0.0991678	0	0	0.0461113	0.0453239	0.144074	0.179848	0.171302	0.167258	0.161167	0.232701	0.233142	0.234613	0.234613	0.277061	0.270552	0.277399	0.383419	0.356573	0.363219	0.419203	0.421523	0.412205	0.40759	0.406061	0.406061	0.431357	0.429289	0.435368	0.429289	0.529407	0.393818	0.388147	0.0383383	0.0383383	0.0461113	0.0461113	0.162994	0.16211	0.386659	0.441992	0.44179	0.413598	0.159226	0.360568
[truncated: 14 more columns]
